# Supplementary material for: Transcriptome analysis of sevoflurane exposure effects at the different brain regions
Source: PLoS One. 2020 Dec 15;15(12):e0236771. doi: 10.1371/journal.pone.0236771 (PMC7737892; doi:10.1371/journal.pone.0236771)
Supplement: S2 Table — The gene names and expression fold change data (sevoflurane group vs control group) of the hippocampus, hypothalamus, striatum, and medial prefrontal cortex are shown. (XLSX) [file pone.0236771.s005.xlsx]

## Sheet: S2 Table
S2 Table	Hippocampus						Hypothalamus						Striatum						MPFC
	Upregulated genes			Downregulated genes			Upregulated genes			Downregulated genes			Upregulated genes			Downregulated genes			Upregulated genes			Downregulated genes
	Gene name	Expression fold change		Gene name	Expression fold change		Gene name	Expression fold change		Gene name	Expression fold change		Gene name	Expression fold change		Gene name	Expression fold change		Gene name	Expression fold change		Gene name	Expression fold change
	Zfp433	7.22526		Rasgrp4	-6.8673		Plaur	3.25465		Hspa1b	-2.07554		Gm20458	19.8099		Gm28635	-19.8997		Gm6565	22.0665		Zfp366	-2.39715
	Tmem239	6.45948		Gm4724	-6.7514		Depp1	2.91004		Hba-a1	-1.51371		Gm4070	4.9422		Cldn2	-16.2445		Chtf8	8.61519		4921539H07Rik	-1.5366
	Gm12657	6.35086		Gm25394	-6.01233		Ccn1	2.42032		Cyyr1	-1.17956		B3gnt6	3.47963		Iigp1	-3.37277		Ccn1	2.95479		Egr2	-1.50117
	Gm49342	5.9064		Gm48512	-5.98314		Apold1	2.20586		Slco1a4	-1.15268		Apold1	2.7551		Zc3h11a	-3.11882		Npcd	2.80668		Inhba	-1.45077
	Gm8399	5.74676		Cntd1	-5.97721		Edn1	2.09649		Erbb3	-1.04202		Gm18782	2.47182		Egr2	-2.34459		Crispld2	2.28165		Gm47664	-1.38777
	Gm11585	5.58189		Gm20661	-5.91775		Ccn2	1.92925		Hes5	-0.990813		A930015D03Rik	2.22677		Gm50024	-1.76058		Edn1	2.24349		Slc40a1	-1.28445
	Hist2h3c1	5.36773		Gm9939	-5.83935		Lrrc32	1.91013		Banp	-0.990147		Depp1	2.0941		Zic3	-1.71368		Thbs4	2.09926		Samd9l	-1.20045
	Gm5084	5.24232		Gm49486	-5.83213		Emp1	1.83566		Nkx6-2	-0.931981		Klf4	2.04325		Nr4a1	-1.57205		Cyp2s1	2.03879		Sox21	-1.1851
	Gm9165	5.21563		Gm37393	-5.79614		Klf2	1.80867		Hist1h4f	-0.905592		Tcim	1.9977		Dusp14	-1.46112		Klf4	2.00736		Gm15681	-1.14394
	Gm40909	5.07538		Gm609	-5.71144		Nes	1.76256		Gm3764	-0.78949		Gm30571	1.95989		Npas4	-1.44076		Apold1	1.83329		Gm37298	-1.14252
	Sox5it	5.06046		Gm48840	-5.59151		Klf4	1.71799		Sall1	-0.753381		Edn1	1.94139		Gm16041	-1.42362		Maff	1.76263		Dio2	-1.1038
	Olfr920	5.02365		1700008B11Rik	-5.48398		Maff	1.6516		Zbtb40	-0.749179		Maff	1.86677		Rnd3	-1.27155		Gm11841	1.75186		Gm4258	-1.09851
	Gm7180	5.00342		Gm13899	-5.35464		Gm49839	1.61279		Nrp1	-0.594333		Ccn1	1.78121		Gm42547	-1.15942		Grem1	1.71022		Gm48726	-1.06246
	Vmn2r-ps88	4.99098		Gbp4	-5.24939		Arl4d	1.58971		Ptch1	-0.567457		Gm7967	1.77768		Egr1	-1.11103		Gm49839	1.70478		Hes5	-1.00797
	Gm35438	4.92164		Ttc30a2	-5.17454		Adamts1	1.48287		Jcad	-0.537291		Gm43460	1.74683		Arc	-1.05398		Bbc3	1.65096		Gm37534	-1.00149
	Ldha-ps2	4.74118		Gm13207	-5.15573		Epha2	1.47498		Hexim1	-0.521539		4731419I09Rik	1.66922		Sox21	-1.04082		Ptch2	1.64899		Gm12940	-0.984062
	Gm44080	4.70758		Gm16096	-5.08628		Tinagl1	1.47223		Tra2a	-0.405349		Klf2	1.66918		Nr4a3	-1.0029		Klf2	1.56386		Gm37011	-0.970272
	Olfr1420	4.61537		Gm12481	-5.00355		Cd93	1.30165		Uhrf2	-0.371766		Adamts1	1.60266		Rgs2	-0.914859		Lhfpl5	1.5525		Gm14636	-0.914343
	Gm5459	4.58148		Otop2	-4.96977		Gadd45g	1.29611					Gm41442	1.58485		Egr4	-0.912555		Cebpd	1.52203		Trib2	-0.89791
	Gm45592	4.56743		Gm42721	-4.94931		Dusp1	1.20982					Gm47512	1.57893		Dbx2	-0.881999		Nes	1.50623		Rnd3	-0.875854
	Gm37135	4.54657		1700034P13Rik	-4.94242		Arrdc2	1.13032					Smad6	1.53398		P4ha1	-0.874958		Epha2	1.47314		Zim1	-0.874858
	Gm42421	4.52812		Adora3	-4.9393		Adamts9	1.03716					Akap12	1.45911		Dusp6	-0.870904		Tinagl1	1.46491		Ptgs2	-0.858005
	Gm45846	4.51939		Melk	-4.88196		Swap70	1.03222					Oaz3	1.44621		Banp	-0.865117		Adamts9	1.46321		Mkks	-0.84467
	Gm12276	4.43638		Glra1	-4.79704		Smtn	1.02215					Rasd1	1.44098		Erbb3	-0.863485		Myl12b	1.45962		Abcb1a	-0.842282
	Gm3252	4.43141		D930028M14Rik	-4.75651		Txnip	0.903899					Abhd15	1.41631		Zbtb40	-0.8613		Ddit4	1.42466		Vwa5b1	-0.839101
	Stard6	4.40781		Vmn2r30	-4.60429		Akap12	0.875305					B130034C11Rik	1.38275		Inhba	-0.857241		Opalin	1.40588		Per2	-0.835889
	Ptprv	4.36603		1700063D05Rik	-4.57667		Arrdc3	0.568869					Gm43488	1.36766		Fam84b	-0.845028		Akap12	1.40186		Banp	-0.817264
	A330033J07Rik	4.36099		Gm44937	-4.56298		Pdlim5	0.53763					Sh2b2	1.35975		Spry2	-0.807575		Gadd45g	1.37988		Egr1	-0.810403
	Gm38223	4.33715		Gm48581	-4.48698		Errfi1	0.534719					Gm49839	1.32461		Prdm15	-0.784996		Smtn	1.32492		Npy1r	-0.794457
	Gm17809	4.29228		Col28a1	-4.40136		Vcl	0.519416					Gm20632	1.31962		Fosl2	-0.784027		Cbx2	1.31534		Dusp6	-0.794358
	4930547M16Rik	4.21429		Gm4462	-4.37565		Clic4	0.439567					Tagap	1.31839		Hectd2	-0.766536		Adamts1	1.2377		Exph5	-0.785537
	Gm6756	4.21163		Gm14327	-4.31665		Ppp1r10	0.410903					Nes	1.25338		Gpr52	-0.752766		Arrdc2	1.19854		Bdnf	-0.78515
	Uba1y	4.19695		Gm37326	-4.31585		Ccdc47	0.329893					Arrdc2	1.23575		Arid3b	-0.744639		Pwwp2b	1.16702		Slco1a4	-0.779603
	Gm11417	4.18952		Gm12035	-4.31221								Gadd45b	1.2264		Klf5	-0.740143		Arl4d	1.16456		Gm3764	-0.736252
	Gm17082	4.12146		Ftl2-ps	-4.29105								Gadd45g	1.20431		Jcad	-0.735564		Hes1	1.1489		Ccdc141	-0.734037
	Clec5a	4.01591		6330411D24Rik	-4.24585								Tinagl1	1.19553		B3gnt2	-0.723507		1700094D03Rik	1.10095		Dlx6os1	-0.733198
	Trat1	4.01449		Gm30251	-4.17061								Bbc3	1.14645		Shroom4	-0.715401		Ciart	1.02891		Nrp1	-0.731033
	Gm6352	3.83302		Tnfsf10	-4.15001								Iffo2	1.13057		Nck1	-0.712847		Map3k21	1.0041		Mis12	-0.721661
	Dnase1l1	3.76201		Gm43229	-4.12147								Ptch2	1.10905		Exph5	-0.688302		Prc1	0.983732		Gm37602	-0.717189
	Gm15319	3.61732		Gm42686	-4.02167								Pkp2	1.10473		Sall1	-0.658202		Dcst1	0.97193		E230020D15Rik	-0.712711
	Mir17hg	3.55748		Xirp2	-3.93947								A430110L20Rik	1.08537		Hspa5	-0.656015		Txnip	0.946345		Boc	-0.705515
	Mrpl48-ps	3.52801		Gm9891	-3.7586								Adamts9	1.0553		Zfat	-0.642192		Sh2d3c	0.942741		Pcdh20	-0.705118
	B3gnt4	3.50589		4930500M09Rik	-3.7265								Evpl	1.0463		Cdh11	-0.621253		Vasp	0.923986		Pdp1	-0.69317
	Gm47004	3.47191		Gm21738	-3.6641								Gm44001	1.04276		Ell2	-0.617539		Dennd3	0.890659		Spry2	-0.685637
	Gm19325	3.34297		0610039K10Rik	-3.57002								B4galt1	1.03202		Pdp1	-0.60931		Clcn1	0.890654		St8sia4	-0.683599
	Gm49086	3.28903		Gm13785	-3.41742								Ddit4	1.00876		Chordc1	-0.608874		Spsb1	0.882298		Jcad	-0.667357
	Gm47665	3.28595		Gm17409	-3.34495								Fam205c	0.995181		Nrp1	-0.607943		Sema3f	0.875226		Dnajc21	-0.665288
	Zfp820	3.2822		Gm16210	-3.27765								1700109H08Rik	0.990255		Ago4	-0.602088		Dusp1	0.870546		Homer1	-0.665137
	Il7r	3.21145		Dennd2c	-3.20731								Gm43660	0.986654		Dusp11	-0.549595		Cd93	0.865319		Lig4	-0.65409
	Edn1	3.11017		Gm11889	-3.16648								2810029C07Rik	0.979999		Manf	-0.5229		Clic4	0.858867		Kcnv1	-0.647634
	Gm47765	3.08623		Olfr1397-ps1	-3.10949								Gm48932	0.979705		Ints8	-0.517608		Zfp189	0.83198		Ppp1r3c	-0.640593
	Gm20457	3.03891		Igflr1	-3.07054								Zfp189	0.958735		Gm36952	-0.511336		Klf15	0.799278		P4ha1	-0.632006
	C920021L13Rik	3.00034		Gm10766	-3.05289								Slc26a6	0.958562		Fbxo33	-0.507643		Ntsr1	0.797381		Tbc1d4	-0.630438
	Ptprcap	2.97959		Gm10518	-3.03791								4933407K13Rik	0.952579		Cttnbp2	-0.503976		Frat1	0.79368		Egr3	-0.607944
	Gm16062	2.97105		Gm15566	-3.01538								2410131K14Rik	0.928974		Sfpq	-0.498352		Slc16a11	0.78745		Kdm7a	-0.593273
	Depp1	2.95633		C130083M11Rik	-2.97113								Fbn1	0.914171		Armh4	-0.497746		Gm29666	0.782469		Htr1b	-0.588957
	Gm1698	2.94496		Gm16213	-2.91511								Trim17	0.8968		Dnajc3	-0.497673		Mafk	0.775092		Cdh10	-0.5855
	Gm19121	2.94239		Gm43984	-2.91027								Fam78a	0.864617		Prpf18	-0.497135		Acvrl1	0.773917		Arpp19	-0.582861
	Cldn19	2.92014		Gm12470	-2.88836								Mafk	0.852644		Peli1	-0.492488		Swap70	0.737591		C1galt1	-0.578647
	Gm4739	2.89447		Gm26984	-2.84796								Dennd3	0.845767		Adgra3	-0.491821		Anln	0.692556		Hspa5	-0.572444
	Gm30970	2.88245		B230206H07Rik	-2.74347								Hist1h1e	0.771273		Lrrc8c	-0.491732		Lama5	0.678304		Nrn1	-0.565662
	Gm44584	2.85133		Pclaf	-2.73261								Nt5e	0.761162		Zc3h12c	-0.489504		Tmem132e	0.674635		Ptar1	-0.561896
	Plaur	2.84161		Avp	-2.66296								Sema4c	0.744979		Aqr	-0.469779		Abcd4	0.670794		Dusp11	-0.549582
	Mei4	2.69136		Gm17110	-2.64946								Tldc1	0.739979		Tbc1d30	-0.468597		Pik3ip1	0.667426		Dnajc1	-0.537087
	Gm7451	2.67671		Gm42875	-2.61526								Aqp11	0.737559		Ric8b	-0.463349		Islr2	0.647494		Gm36952	-0.534409
	Tcim	2.66548		Gm37598	-2.55528								Slc35e4	0.693305		Snrnp48	-0.462871		Vcl	0.643099		Man1a	-0.526208
	Gm7278	2.66079		Gm26638	-2.53234								Akap2	0.687816		Srpk1	-0.45919		Zscan20	0.63753		Cdh11	-0.525438
	Gm28455	2.61573		Gm43953	-2.51553								Zfp941	0.671448		Nup153	-0.458499		Sox12	0.629404		Manf	-0.518066
	Mpc1-ps	2.51683		Gm17076	-2.47812								Pcgf2	0.668554		Ccdc93	-0.452749		Uvssa	0.616069		Jak2	-0.5103
	Alms1-ps1	2.51022		Gm18225	-2.4447								2020-03-09	0.647177		Plk2	-0.448551		Mal	0.610673		Elovl6	-0.509254
	Tagap	2.47739		Cdc20	-2.41506								Trp53inp1	0.644631		Slc36a1	-0.447601		Aff1	0.602732		Spred2	-0.505936
	Gm15512	2.43217		Gm10382	-2.39139								Htr5a	0.642645		Spred2	-0.443007		Timp3	0.591884		Tmem47	-0.492754
	Olfr1417	2.41782		Gm3896	-2.38844								Rasl11b	0.639333		Cep126	-0.442883		Hist1h1e	0.575301		Ccdc93	-0.489604
	Apold1	2.37948		Gm31763	-2.36581								Ndst2	0.63816		Jak2	-0.43786		B3galt5	0.561202		Inka2	-0.488237
	Foxf1	2.37726		Gm48717	-2.2852								Txnip	0.617884		Med23	-0.436033		Ttn	0.557043		Zfp24	-0.484109
	CK137956	2.30696		Gm38245	-2.27106								Elmsan1	0.613514		Ccng2	-0.433583		Zkscan2	0.548594		Prdm15	-0.480295
	Serpine1	2.29415		4930524O07Rik	-2.23517								Arrdc3	0.593581		Srsf6	-0.427124		Ppp1r10	0.547654		Heatr1	-0.478669
	Maff	2.28495		Gm16299	-2.22694								Slx1b	0.58924		Hnrnph1	-0.40965		Eid2b	0.53274		Btbd3	-0.475194
	Gm43279	2.2734		Pdzph1	-2.21742								Fam43b	0.570671		Osbpl8	-0.402637		Nbeal2	0.532688		Nwd2	-0.474669
	Ccn1	2.26217		Ccdc102a	-2.21682								Chic2	0.560964		Ncoa5	-0.402005		Baiap3	0.527394		Chordc1	-0.474432
	Mmp9	2.21994		Rnu3a	-2.177								Synm	0.553792		Kmt5b	-0.40184		Jun	0.523852		Fbxw7	-0.472825
	S100a11	2.19178		Dnph1	-2.16777								Tob2	0.53085		Btaf1	-0.395294		Neat1	0.520819		Chuk	-0.470572
	Itk	2.18056		Gm43566	-2.12407								Tmem132e	0.528109		Ide	-0.367155		Man2b2	0.513537		Synj2bp	-0.469692
	Ctla2a	2.16		Gm37877	-2.12186								Pcyt1a	0.523639		D5Ertd579e	-0.355321		Lgi3	0.479795		Rbm28	-0.466077
	Tgif1	2.12159		Gm37717	-2.11583								Ldlr	0.519777		Gramd1b	-0.35332		Ubald1	0.478632		Fam13c	-0.46555
	Celrr	2.06047		Gm12896	-2.10829								Plat	0.510257		Mdn1	-0.350702		Ldlr	0.476173		Ccng2	-0.462705
	Gm9892	2.04513		Hist1h2bk	-2.09349								Ubxn7	0.500388		Tmf1	-0.3388		Peli3	0.475432		Ankrd6	-0.461341
	Gm17396	1.99649		Gm43577	-2.09085								Pik3ip1	0.492974		Edem3	-0.333341		Zfp687	0.474783		Hnrnph1	-0.457223
	Gm43605	1.99414		Rrad	-2.06589								Tspan9	0.481233		Elmo1	-0.322596		Synm	0.474713		Pibf1	-0.442328
	Gm4793	1.97206		Gm48699	-2.04994								Xpc	0.479296		Trim9	-0.312139		Itga3	0.471139		Tra2a	-0.43103
	Pp2d1	1.9511		4831440D22Rik	-2.00794								Clic4	0.469327		Eif4g2	-0.306704		Fam214a	0.466961		Hsph1	-0.42851
	Gm17244	1.91915		4930522L14Rik	-2.00606								Timp3	0.461035		Ankrd50	-0.297852		Oplah	0.460948		Homer2	-0.426827
	Gm17276	1.87606		Gm42418	-1.97593								Rab40c	0.438561		Srcap	-0.288932		Fstl1	0.446272		Fbxo33	-0.422042
	2810454H06Rik	1.86533		Gm43039	-1.96088								Smg5	0.415075					Dpysl5	0.425718		Raph1	-0.4172
	Gm43329	1.84943		Slurp1	-1.94236								Lyrm9	0.412505					Slc32a1	0.416332		Cttnbp2	-0.412885
	Afmid	1.83341		Gm44445	-1.93288								Amer3	0.407056					Fam171a2	0.412324		E330009J07Rik	-0.40624
	Aldob	1.82717		D830025C05Rik	-1.91674								Gtf2ird1	0.374704					Mthfr	0.411407		Tiam2	-0.401613
	Kirrel3os	1.75196		9630001P10Rik	-1.90785								Ppip5k2	0.369899					Ddr1	0.408187		Flrt3	-0.394244
	A930003O13Rik	1.72653		Hist2h2ab	-1.90644								Lman1	0.321792					Amer3	0.407913		Dsel	-0.391279
	Gm43031	1.71795		Slc35d3	-1.90072								Tef	0.281384					Flnb	0.401212		Fndc3a	-0.367043
	Crispld2	1.70149		Gm14964	-1.85497														Gm9866	0.399942		Smarca5	-0.363341
	Gm45187	1.68169		4932441J04Rik	-1.8517														Dennd6b	0.39475		Eif4g2	-0.357584
	Cstad	1.65042		Gm44643	-1.84434														Efnb3	0.387495		Man1a2	-0.346917
	Gm43335	1.64005		Cd163	-1.81959														Tenm3	0.370197		Ccdc186	-0.346643
	BC055308	1.60025		Gm20634	-1.80862														Aldh2	0.369185		Ccpg1	-0.345252
	Klf4	1.59854		Gm5820	-1.79755														Zfp865	0.352996		Atf4	-0.343494
	Akap12	1.58259		Gm6263	-1.75488														Apc2	0.352956		Osbpl8	-0.341824
	Gm43875	1.57047		Gm10602	-1.72718														Atp8b2	0.339557		Dlg1	-0.340112
	Pde6h	1.56425		Gm2810	-1.72465														Abcg1	0.304274		Rapgef5	-0.327715
	Gm45220	1.53902		Sox21	-1.72343																	Kmt5b	-0.322105
	Nme6	1.52841		AC020971.1	-1.7161																	Lrrtm3	-0.318415
	Tcf19	1.52516		Sp100	-1.69211																	Ahctf1	-0.310864
	Zfp119b	1.47786		Gm4617	-1.65141																	Aftph	-0.292281
	Tlr7	1.47752		Gm38069	-1.63212																	Srpk1	-0.291263
	Nes	1.47637		Gm5464	-1.63191																	Stum	-0.288933
	Epha2	1.45643		Gm37844	-1.60306																	Ythdc1	-0.283612
	Gm4221	1.43102		Gm37478	-1.60236																	Mlec	-0.269531
	Gm41442	1.4082		E030026E10Rik	-1.60116																	Taf1	-0.264409
	Zfp59	1.375		Gm45516	-1.58351																	Hipk3	-0.25889
	Primpol	1.36829		3110021N24Rik	-1.57538																	Tacc1	-0.250969
	9030407P20Rik	1.36011		Gm37885	-1.55316																	Usp31	-0.222289
	Tes	1.35368		Gm37811	-1.54093
	Gm49839	1.34974		Gm49971	-1.53781
	Vsig10l	1.30503		Rgl3	-1.52004
	Gm45464	1.30234		Gm37945	-1.51769
	Zfp51	1.29276		H2-Q4	-1.51281
	Gm50321	1.28539		Nfkbid	-1.50613
	Gpr88	1.28392		Trip6	-1.4972
	Tinagl1	1.28169		Hist1h2bf	-1.48952
	Gm10461	1.28136		Gm38116	-1.4862
	Zfp982	1.27886		Flvcr2	-1.47304
	Lsm10	1.27788		Usp43	-1.46551
	Gm20633	1.24956		Gm21168	-1.43491
	4933433G19Rik	1.22135		Olfr239	-1.39969
	Gm20683	1.21443		Zfp366	-1.39867
	Cd93	1.18948		Trmt61b	-1.3668
	Abcb1b	1.18811		Gm50115	-1.36461
	Nostrin	1.17262		Gm37436	-1.36221
	Anxa3	1.16849		Gm10819	-1.35665
	Atp5g2	1.16718		6430562O15Rik	-1.35195
	Nsun6	1.14531		Gm37524	-1.3517
	Cd33	1.13867		Rab11fip1	-1.34054
	Gck	1.12911		Fyb	-1.33043
	Dusp1	1.1164		Mmp28	-1.32549
	Ano2	1.11053		Fbxl22	-1.31281
	Btg3	1.09951		Gm6934	-1.31086
	Zfp85	1.09906		Gm44065	-1.29203
	Gm48872	1.08404		Gm43318	-1.29188
	Pkdrej	1.07517		Proser3	-1.27344
	Wfdc1	1.06877		Lrch4	-1.27237
	Fancd2	1.06756		Gm37593	-1.2621
	Rhoj	1.05568		Gm42692	-1.2589
	Hmox1	1.04515		Gm10645	-1.23676
	Ccn2	1.04377		D730003I15Rik	-1.22166
	Serpinb8	1.04333		Gm44745	-1.21811
	Adgrl4	1.0347		Sdf2l1	-1.2167
	Sdhaf1	1.02492		Gm48726	-1.21611
	Gm13443	1.02308		Plxna4os2	-1.21236
	Pld5	1.01732		2900022M07Rik	-1.20543
	2810029C07Rik	1.01535		Macrod2os2	-1.19843
	Zfand4	0.988341		mt-Nd2	-1.19289
	Mc4r	0.988244		Hist2h2aa2	-1.18766
	Arrdc2	0.968914		Cldn5	-1.18633
	Pfn4	0.959837		Gm37003	-1.17181
	Lrrc56	0.959494		Gm42478	-1.16676
	Snurf	0.938605		Gas1	-1.14837
	Slc25a53	0.931712		Slc2a4rg-ps	-1.13701
	Fos	0.929056		Prkg2	-1.13687
	Vstm5	0.927546		Romo1	-1.11238
	Ccdc65	0.914541		2810459M11Rik	-1.10993
	Ctbs	0.91362		Gm10638	-1.0851
	Wdhd1	0.913116		D130019J16Rik	-1.07101
	Fcgr3	0.907797		Gm37530	-1.06722
	Sgk3	0.905148		Gm42444	-1.06234
	1700029J07Rik	0.897344		Cys1	-1.05566
	Cradd	0.889008		9430041J12Rik	-1.04885
	Pla2g4e	0.886463		Erbb3	-1.0366
	B4galt1	0.884096		A130050O07Rik	-1.03572
	A930005H10Rik	0.879551		Bloc1s3	-1.01958
	Rpl5	0.876559		Lhfp	-1.01549
	Smtn	0.85325		Jak3	-1.01392
	Pus10	0.829254		Gm20878	-1.01369
	Zfp810	0.822172		Gm44022	-1.00244
	Timm9	0.819734		BC030499	-0.978245
	Mospd2	0.816609		Pou3f4	-0.975583
	Mkks	0.802529		Gm42547	-0.957393
	Dnah7b	0.793282		Gm26814	-0.950195
	Hypk	0.789461		Zfp125	-0.941277
	Gm26981	0.788674		Ier5	-0.930363
	Dennd3	0.78428		Dnm3os	-0.924228
	Gm14325	0.78361		Mrpl36	-0.922126
	Siglech	0.777231		Card10	-0.911972
	Tm4sf1	0.775269		Gm48796	-0.91005
	Trp53inp1	0.763093		Cdyl2	-0.904724
	Hacd4	0.755386		Arid3b	-0.894918
	Robo4	0.749648		Kank3	-0.889176
	Cdh5	0.748551		Klhl21	-0.882939
	Cep192	0.744369		Gm42715	-0.881221
	Rai14	0.738877		Col11a2	-0.878999
	Etnppl	0.738729		Synpo2	-0.878492
	Efcc1	0.736751		Cckbr	-0.875895
	Gm3448	0.734841		Gm3764	-0.874791
	Apoo	0.723165		Gm49069	-0.868599
	Gm5148	0.720662		C1ql1	-0.863899
	Fgf2	0.718138		Ret	-0.858732
	Gm43737	0.717694		Trim36	-0.849454
	Greb1l	0.716977		Nr2f6	-0.849053
	Rela	0.705209		Tmem200c	-0.848727
	Thbd	0.688383		Crlf2	-0.848595
	Gm10076	0.687715		Sall3	-0.842552
	Zc3h6	0.683368		Id3	-0.841776
	Tma16	0.676013		Xbp1	-0.837642
	Adamts1	0.673867		Trim25	-0.830052
	Minar1	0.669781		Slc16a11	-0.825756
	Caprin2	0.658697		Gm43322	-0.824363
	Pcdhga5	0.657832		Eva1a	-0.819535
	Eif2b3	0.655969		Gm48623	-0.817688
	Wdr75	0.645216		Ercc2	-0.816846
	Hspa14	0.643372		P3h3	-0.81445
	Lrrc40	0.633386		Caap1	-0.811169
	Spsb1	0.631812		Mapkapk5	-0.81106
	Timp3	0.63041		Pola2	-0.808752
	Minar2	0.62884		Lsm4	-0.804671
	Dcaf13	0.624571		Gm26803	-0.804356
	Rbbp9	0.621647		Mien1	-0.803394
	Pecam1	0.620771		Gm13889	-0.797734
	Txnip	0.61442		Phf1	-0.797119
	Phf13	0.608953		P3h1	-0.796179
	Psmd14	0.607424		Cebpa	-0.791878
	Atp6v0e	0.603739		Klf5	-0.783708
	Galnt10	0.592797		Etohd2	-0.783513
	Psmc6	0.590351		Banp	-0.781308
	Arhgap27	0.586598		Gm43175	-0.776696
	Spata5	0.581835		4930488L21Rik	-0.769531
	Arrdc3	0.575861		Kif19a	-0.768928
	Psma6	0.571091		Cbfa2t3	-0.767799
	Grem2	0.570324		Tjap1	-0.76099
	Zkscan2	0.566603		Bak1	-0.75053
	Mrpl30	0.564335		Tcirg1	-0.748553
	Pdlim5	0.56011		Zbtb40	-0.746987
	Sik1	0.556013		Zfp444	-0.73977
	Acvrl1	0.555715		Gm42946	-0.736614
	Ube2v2	0.553066		Zfp771	-0.733548
	Zfp941	0.54456		Ccdc77	-0.731866
	Vcl	0.543921		Taf3	-0.728714
	Mtpap	0.543363		Zw10	-0.72775
	Pex3	0.542341		Kcnk1	-0.727233
	A430033K04Rik	0.537513		Zfp383	-0.726183
	Polr3e	0.535831		P3h4	-0.725373
	Nol12	0.534216		Ism1	-0.723826
	Mrpl41	0.529312		Phlda3	-0.723686
	Wdr17	0.507462		Tmem163	-0.718698
	Clic4	0.501181		Foxo6	-0.71045
	Nudcd1	0.497457		Btbd17	-0.710248
	Arxes2	0.495887		Xkr6	-0.709752
	Ift20	0.488733		Samd1	-0.705563
	Scg5	0.485387		Tox3	-0.699638
	Errfi1	0.484012		Numb	-0.697185
	Psmf1	0.480875		Sap30l	-0.697084
	Xpo4	0.479654		Gpr27	-0.691737
	2310057M21Rik	0.464266		Borcs6	-0.684263
	Hdac3	0.462454		Tldc1	-0.684057
	Zfp940	0.462375		Ccdc84	-0.682779
	Zfp869	0.461605		Prdm15	-0.682651
	Htr5a	0.460023		Crebzf	-0.677667
	Vmp1	0.457861		Abca7	-0.675858
	Pfdn2	0.457499		Hist1h1d	-0.673046
	Cox7c	0.454223		Epop	-0.668864
	Atad1	0.453395		Lemd2	-0.664738
	Cops4	0.44887		Ccdc9	-0.663159
	Hist3h2ba	0.447576		Prpsap1	-0.661535
	Cops3	0.443951		Sox2	-0.652624
	Gas5	0.442223		Gpr17	-0.651399
	Atp11b	0.438927		Lime1	-0.63711
	Insig1	0.434679		Taf8	-0.636423
	Trpc4	0.434381		Gas2l1	-0.635905
	Psme4	0.433263		Fam43b	-0.634791
	Snapc1	0.428259		Trnp1	-0.634734
	Stambp	0.426428		Ano8	-0.631561
	Atm	0.42248		Chkb	-0.628633
	Slc36a4	0.420483		H1fx	-0.62286
	Ldlr	0.419495		Yeats4	-0.622554
	Vps50	0.411581		Rrp1b	-0.622063
	Carf	0.40535		Deptor	-0.620902
	Gfra1	0.396408		Pcdh8	-0.618301
	Pik3ip1	0.393633		Cabp1	-0.614025
	Ppp1r11	0.385576		Capn15	-0.613008
	Rbmx	0.375015		Atp10a	-0.612767
	Fam210a	0.374051		Tmtc3	-0.611671
	Ndufv2	0.372562		Rexo4	-0.608955
	Dicer1	0.371743		Plpp1	-0.608324
	Grb10	0.364309		Vat1	-0.605896
	0610010F05Rik	0.360279		Adamts17	-0.603745
	Gid8	0.357271		Mafb	-0.603217
	Hnrnph2	0.356761		Dact3	-0.601034
	Usp30	0.35628		Osbpl5	-0.601033
	Slc39a14	0.351093		Hspa5	-0.600901
	Trappc12	0.341764		Grin2d	-0.598334
	Copb1	0.340093		Hmgcll1	-0.593311
	Acsl1	0.331676		Srrm3	-0.586005
	BC004004	0.331156		Mtcl1	-0.584986
	Ppp1r10	0.32296		Tbc1d4	-0.5839
	Pitrm1	0.316079		Mir99ahg	-0.582073
	Micu1	0.31213		Sh3bp5l	-0.57884
	Prune2	0.31063		Slc25a19	-0.577133
	Mllt11	0.302196		Irf3	-0.57654
	Tox4	0.299541		Adamts2	-0.575886
	Cbfa2t2	0.298719		Dubr	-0.574338
	Nt5c2	0.297319		Pou3f3	-0.572648
	Txndc16	0.295213		Ppp1r37	-0.570329
	Sf3b1	0.284875		Pcdha12	-0.568796
	Gosr2	0.270654		Tnrc18	-0.568498
	Stxbp5l	0.269561		Notch3	-0.56551
	Grid1	0.262823		Kcnj9	-0.565143
				Pygo2	-0.563712
				Tmem158	-0.562585
				Isyna1	-0.560058
				Rgl2	-0.558811
				Notch1	-0.557597
				Vipr1	-0.55614
				Tnks1bp1	-0.555111
				Atg4d	-0.554044
				Kifc3	-0.553806
				Pdia6	-0.55161
				Rn7s1	-0.551223
				Cmpk2	-0.550026
				Zfp598	-0.549222
				Sbk1	-0.548914
				Alk	-0.548446
				Bcl9l	-0.546318
				Zfp36l2	-0.54558
				6330403L08Rik	-0.545183
				Arfip1	-0.544004
				Bad	-0.543078
				Efnb2	-0.541297
				Rcor1	-0.541159
				A330023F24Rik	-0.540777
				Stambpl1	-0.540596
				Lrrc45	-0.540271
				Trib2	-0.53989
				Igsf9b	-0.53647
				Zfp428	-0.534969
				Crocc	-0.534825
				Ormdl3	-0.533288
				Gm36952	-0.532645
				Vash1	-0.532549
				Zgpat	-0.532268
				Dpp7	-0.5322
				Cry1	-0.531359
				Plxnb3	-0.531053
				Dhx16	-0.527254
				Zbtb7a	-0.526342
				Arhgef40	-0.524345
				Ccnd1	-0.522571
				Nop2	-0.520644
				Lmnb2	-0.517936
				Sox4	-0.516563
				C1galt1	-0.516483
				Arhgef1	-0.516291
				Rtn4r	-0.516214
				Nat8l	-0.514682
				Hdac5	-0.513475
				Ryk	-0.513014
				Snx21	-0.512085
				Obsl1	-0.506059
				Jph3	-0.505491
				Dapk3	-0.504919
				Eid2	-0.504773
				Zfpm1	-0.503562
				Cntrl	-0.503003
				Pigg	-0.50217
				Usp21	-0.499468
				Rab1b	-0.498864
				Sorcs1	-0.498467
				Phrf1	-0.496808
				D1Ertd622e	-0.494284
				Irgq	-0.494158
				Narf	-0.492378
				Adcy6	-0.492286
				Zfp219	-0.489923
				Mettl16	-0.489533
				Il34	-0.48725
				Pkn1	-0.487011
				Zbtb2	-0.484937
				Grm2	-0.484118
				Lrch1	-0.484031
				Sstr3	-0.483835
				Sfpq	-0.482902
				Cers1	-0.479785
				Hrk	-0.479308
				Frmd5	-0.478588
				Fam129b	-0.477926
				Khdrbs3	-0.476051
				Pcdhgb7	-0.475884
				Phtf2	-0.475308
				Dnajb5	-0.471933
				Trir	-0.471323
				Stx18	-0.470654
				Ahdc1	-0.469977
				Hexim1	-0.467985
				Sox11	-0.467744
				Ftx	-0.465927
				Gfod1	-0.465836
				Rhot2	-0.464826
				Taldo1	-0.464655
				Cxxc5	-0.464554
				Lrfn4	-0.464489
				Sclt1	-0.461396
				Gse1	-0.461114
				Garem2	-0.459997
				Nelfa	-0.459656
				Irf2bpl	-0.459039
				Kank1	-0.458698
				Stk38	-0.456897
				Scrib	-0.452696
				Slc25a42	-0.450281
				Man2a1	-0.448481
				Szrd1	-0.448353
				Fkbp4	-0.446905
				Kcnh3	-0.444799
				Dot1l	-0.444162
				Upf3a	-0.441662
				Lzts3	-0.441195
				Stk24	-0.440568
				Nuak1	-0.435729
				Dtx1	-0.434787
				Abhd8	-0.42801
				Marcks	-0.427404
				Msl2	-0.427111
				Acin1	-0.425347
				Tent4a	-0.423827
				Josd1	-0.421179
				Mfsd12	-0.419123
				Otud7a	-0.416871
				Tent4b	-0.41554
				Smox	-0.414538
				Camk2n1	-0.412661
				Zfyve28	-0.410353
				Cxxc1	-0.407495
				Msl1	-0.407442
				Arl4c	-0.407197
				Arhgef18	-0.405262
				Anks1	-0.40366
				Pibf1	-0.40167
				Jmy	-0.401292
				E2f6	-0.400696
				Otud5	-0.395699
				Zcchc2	-0.393328
				Tmem259	-0.393011
				Map3k5	-0.392552
				Adgrb1	-0.389588
				B4galt5	-0.386491
				Setd1b	-0.386152
				Tet3	-0.386058
				Tra2a	-0.381372
				Kcng1	-0.380239
				Src	-0.374986
				Ina	-0.370894
				Pkd2	-0.369387
				Ccdc85c	-0.367367
				Sh2b1	-0.365645
				Lrfn1	-0.364713
				Mtmr4	-0.364687
				Zfyve26	-0.364674
				Iws1	-0.363404
				Lemd3	-0.361535
				Slc39a3	-0.356466
				Dennd2a	-0.352526
				Nin	-0.346177
				Mapk14	-0.344347
				Chd1	-0.343876
				Ccnl2	-0.342067
				Brd3	-0.340008
				Mlec	-0.337075
				St3gal2	-0.331303
				Phlpp2	-0.330539
				Gigyf2	-0.330502
				Bahd1	-0.328552
				44079	-0.328393
				Lhfpl4	-0.327955
				Tspan5	-0.327729
				Adgrl1	-0.326566
				Lasp1	-0.325438
				Fam117b	-0.319024
				Myo10	-0.315926
				Plxnb1	-0.312997
				Cacna1i	-0.311707
				Ubn1	-0.307992
				Alkbh5	-0.307623
				Mapkap1	-0.297557
				Ski	-0.293235
				Ddr1	-0.293124
				Kcnh1	-0.287285
				Kcnc1	-0.285528
				Baz1b	-0.273966
				Wipf2	-0.270937
				Cdk13	-0.267417
				Stox2	-0.264108
				Usp31	-0.251749
				Cbx6	-0.249053
				Lmtk2	-0.185025
				Tacc1	-0.176769
