# Supplementary material for: Transcriptome analysis of sevoflurane exposure effects at the different brain regions
Source: PLoS One. 2020 Dec 15;15(12):e0236771. doi: 10.1371/journal.pone.0236771 (PMC7737892; doi:10.1371/journal.pone.0236771)
Supplement: S6 Table — The gene names and each expression fold change data (sleeping group vs control group) for the upregulated and downregulated genes are shown. (XLSX) [file pone.0236771.s009.xlsx]

## Sheet: S6 Table
S6 Table	Upregulated genes			Downregulated genes
	Gene name	Expression fold change		Gene name	Expression fold change
	Mdm2	3.29761		Ifi35	-3.22205
	Angptl1	2.41479		Tfap2c	-3.03332
	Ttpa	2.30119		Prkd2	-2.96213
	Nsmce4a	2.12818		Mup10	-2.81798
	Gas5	2.1189		Hspa8	-2.78007
	Ywhab	2.07966		Slx1b	-2.77948
	Mastl	2.05673		Vash1	-2.71743
	Foxf1	2.00789		Polb	-2.7134
	Mycbp2	2.00333		Egr2	-2.65789
	Ebf1	1.99074		Pcdh15	-2.63322
	Apof	1.98159		Fbn2	-2.62095
	Mxra7	1.97844		Ncam1	-2.56467
	Lrp2bp	1.9723		Rmi1	-2.54863
	B230217C12Rik	1.95855		Ube2l6	-2.54542
	Bace2	1.91439		Dram1	-2.54309
	Sp100	1.90687		Serpinh1	-2.53302
	9030407P20Rik	1.90107		Syk	-2.52682
	Bcl2l11	1.8927		Rps6ka2	-2.50097
	Milr1	1.88528		D030055H07Rik	-2.49037
	Vti1a	1.85929		Spry4	-2.47792
	Rimbp3	1.81103		Metrn	-2.4691
	Slc13a5	1.79602		Dmp1	-2.46806
	Trav9d-3	1.78285		Kcnj6	-2.41873
	Gjc1	1.77078		Itga8	-2.41796
	Ripk2	1.73939		2810002D19Rik	-2.4123
	Ntn3	1.72022		H13	-2.40775
	Fubp1	1.71589		Mettl7a1	-2.40458
	Nkapl	1.70344		Tmem120a	-2.38714
	2610001J05Rik	1.692		Gm4876	-2.35358
	Eya3	1.67224		Fam13c	-2.34907
	Clec10a	1.66994		Marveld1	-2.34749
	Txnl1	1.6628		Utp23	-2.34667
	1700034I23Rik	1.64099		Fos	-2.33925
	Cep164	1.64079		Actl6a	-2.31388
	Txnrd3	1.62822		P2rx7	-2.31314
	4933404K08Rik	1.62757		Vcan	-2.3049
	Rpf1	1.6088		Per2	-2.30286
	Fabp4	1.60431		Ppp1r9a	-2.28949
	Dsn1	1.59617		Cklf	-2.27972
	Ntf3	1.59243		Sypl	-2.27958
	Nck1	1.58948		Narf	-2.27949
	1700001P01Rik	1.58453		Pld1	-2.26931
	Baat	1.5841		Gm26745	-2.26916
	Igbp1b	1.57942		Zcwpw2	-2.25126
	Mib1	1.57759		Ttf2	-2.25002
	Aox4	1.57682		Mapkapk2	-2.23892
	Spa17	1.56958		Gadd45b	-2.22645
	Pkmyt1	1.56479		Cenpu	-2.22569
	Cnnm3	1.55793		Sbk1	-2.21562
	Fam172a	1.53216		4933403L11Rik	-2.20907
	Fgl2	1.52708		Chrna5	-2.18319
	Fap	1.51738		Thsd4	-2.17828
	Aurkb	1.51625		Ppp1r12b	-2.17583
	1700082M22Rik	1.51138		Filip1l	-2.16902
	Mlph	1.50755		Akap10	-2.16684
	Strada	1.50558		Etnppl	-2.16484
	Fbxw22	1.50417		Ptgs1	-2.16376
	Kank3	1.5027		2900041M22Rik	-2.1489
	Ubc	1.49715		Smo	-2.14475
	Tmem67	1.47555		Arc	-2.13486
	Ntsr1	1.47509		Minar1	-2.13329
	Myrfl	1.47405		A330076H08Rik	-2.1309
	Krt18	1.46663		2500002B13Rik	-2.13022
	Chek1	1.4623		Nr4a1	-2.12868
	Tmem125	1.46217		Pcgf6	-2.12554
	1110032F04Rik	1.46175		Camk2d	-2.11853
	Morc2b	1.45499		Proz	-2.11045
	Phf20	1.45071		Zscan20	-2.10503
	Dok1	1.44265		Pitpnm3	-2.09614
	Lmbr1	1.44008		1810013D15Rik	-2.09081
	Vav2	1.43465		Nup153	-2.07395
	Sgcd	1.43455		Foxq1	-2.06785
	Ndfip2	1.43405		3110001I22Rik	-2.05875
	Slc23a1	1.4263		Pdzd9	-2.05198
	Grtp1	1.42463		Gm9958	-2.04731
	Cdk6	1.42079		Usp3	-2.04227
	Muc1	1.40097		Srcap	-2.03677
	Cbx1	1.39416		Ngf	-2.0313
	Fbln7	1.38961		Macc1	-2.02701
	Tsc22d1	1.3886		Srrm2	-2.02495
	Itga1	1.37881		Clock	-2.01883
	Mecom	1.37626		Tra2a	-2.01856
	Pax6	1.37203		Galnt9	-2.01722
	A730011C13Rik	1.36643		Rpl35	-2.0152
	A730091E23Rik	1.36346		5031425E22Rik	-2.00018
	Bche	1.36261		Gdpgp1	-1.9958
	Fank1	1.3569		Tmpo	-1.99467
	9630001P10Rik	1.35518		Elovl7	-1.99217
	AU022252	1.34595		Prr16	-1.99144
	Sco1	1.33184		Eva1c	-1.9873
	Clcn3	1.33029		Kcns3	-1.98481
	Igf2os	1.32446		Surf2	-1.98474
	Gabrg3	1.31994		Wdr61	-1.97945
	Cirbp	1.31865		Pigg	-1.97659
	Fam136a	1.31134		Sema6d	-1.96905
	En2	1.30741		Itm2b	-1.96591
	Clec14a	1.30717		Enkur	-1.96329
	Bst1	1.29863		Pdgfd	-1.95984
	Pgap2	1.28773		Col27a1	-1.95947
	Nudt7	1.28752		Pcdhb13	-1.95706
	Ltbp2	1.28507		Arih1	-1.95544
	Ddit3	1.28408		Mrpl17	-1.95301
	C730034F03Rik	1.2779		Gnpnat1	-1.94657
	Scnn1a	1.27667		Micu1	-1.93796
	Fam117a	1.27021		Hinfp	-1.93578
	P2ry6	1.26103		Hspa1b	-1.93553
	Sla	1.2592		C6	-1.93239
	Mtf2	1.25831		Anks3	-1.92722
	Clec4a2	1.25808		6330549D23Rik	-1.92713
	Usp53	1.2577		Clip1	-1.927
	Klk1	1.25482		Trmt13	-1.92643
	Rbp7	1.25341		Ccdc40	-1.92629
	Akr1c20	1.25045		Ttc3	-1.92417
	Gla	1.24827		Ccdc39	-1.92391
	Ttll8	1.24642		Pdgfra	-1.9226
	2210010C04Rik	1.24245		Nmt2	-1.91145
	Lbx1	1.23424		Pcyt1b	-1.91116
	9530046B11Rik	1.23118		Slco1a4	-1.90871
	B830017H08Rik	1.21746		Sod3	-1.90765
	Dpf2	1.21516		Galnt4	-1.9062
	Serpinb1a	1.21474		Ppil3	-1.90368
	Col4a5	1.20775		Slc38a9	-1.90324
	Azin2	1.20721		Nrk	-1.903
	Cdkl3	1.20496		Thada	-1.90184
	1700086O06Rik	1.20446		Tlr13	-1.89863
	Tns3	1.19694		Fbxo27	-1.89487
	Efcab3	1.1921		Map4k4	-1.8931
	Cnot2	1.1875		Mroh2a	-1.88412
	Psmg4	1.18682		Bves	-1.88307
	4930513N10Rik	1.18463		D430042O09Rik	-1.88001
	Rpl41	1.18402		Eps8l1	-1.87742
	Onecut1	1.17774		Pde1c	-1.87697
	Dancr	1.17608		Vezf1	-1.876
	Noc2l	1.17531		Clmn	-1.87581
	Accs	1.17505		Clic5	-1.87565
	Slc38a4	1.1712		Ak8	-1.87475
	Bcorl1	1.17101		Abi1	-1.87123
	Prox1	1.16607		Trdn	-1.86628
	Bpifa3	1.16278		Cyp2d40	-1.86256
	Capn6	1.16251		Zfp959	-1.86016
	Dmgdh	1.16115		Qars	-1.85851
	Trim5	1.16091		Myo19	-1.85781
	Zfp474	1.16017		Dusp1	-1.85756
	2410004P03Rik	1.15323		Rbms3	-1.85518
	Pced1b	1.15021		Wipi1	-1.85441
	Gpd1	1.14685		Grm7	-1.84678
	Apoa1	1.14675		Synpo2	-1.8422
	Cep126	1.14304		Acot2	-1.83479
	1700061E18Rik	1.1426		Hbs1l	-1.83386
	Nup160	1.13862		Oprm1	-1.83272
	Cmss1	1.12875		Pdlim5	-1.83259
	Mtfr1	1.1242		Myh9	-1.82942
	Olfr672	1.12223		Brd8	-1.82881
	Gpr174	1.12142		Pes1	-1.82833
	Gmfb	1.12109		Slc4a11	-1.82163
	Fmo5	1.11945		2610028D06Rik	-1.81983
	Adra2a	1.11778		Rnf139	-1.81661
	Psmf1	1.11543		Vegfc	-1.81289
	Tmbim7	1.11537		Pigc	-1.80994
	Acvr2b	1.11535		Tmc4	-1.80971
	Slc35a2	1.11022		Igsf3	-1.80947
	Calcb	1.109		Rassf2	-1.80539
	Spats2l	1.10488		1810059H22Rik	-1.80169
	Ccdc166	1.10223		Ppifos	-1.79821
	Atf3	1.10098		Trpc4ap	-1.79676
	E130317F20Rik	1.10009		A430108G06Rik	-1.79612
	Epgn	1.09706		Spidr	-1.7918
	Gm10228	1.09139		Tmed5	-1.79135
	Btc	1.09031		Otub2	-1.79004
	Xpo4	1.08868		6720489N17Rik	-1.78765
	Trip13	1.08829		Papola	-1.78411
	P2rx4	1.08093		Marveld2	-1.77883
	Tmem229b	1.07928		Pck1	-1.77792
	Efs	1.07792		Trp53bp1	-1.77748
	1810019D21Rik	1.07469		Eral1	-1.7715
	1700031F05Rik	1.07185		E2f5	-1.77103
	Ankrd1	1.07015		Vav3	-1.77052
	Arhgef2	1.06986		Mak	-1.76984
	2610027K06Rik	1.0684		Dclre1c	-1.76969
	Reg1	1.06123		Zscan12	-1.76831
	Sox14	1.06106		Zfp651	-1.7683
	Kif2c	1.05694		Disp2	-1.76675
	5930412G12Rik	1.05618		Dusp4	-1.76626
	Parp3	1.05436		Twist1	-1.76475
	Sike1	1.0536		Uncx	-1.76453
	Spcs1	1.05279		Kantr	-1.76188
	Paqr5	1.05005		Zbtb25	-1.7555
	Ctbs	1.04574		Nsun7	-1.75351
	Apoc3	1.04501		Vnn1	-1.75219
	Atp2a2	1.04472		Arhgef1	-1.7508
	Sp5	1.03739		Maff	-1.75059
	Det1	1.03575		Rhobtb1	-1.74924
	Ctsl	1.03547		Rbm12b1	-1.74721
	Wac	1.03485		Lrrc75b	-1.74326
	Rgn	1.03444		Hars2	-1.73976
	5033404E19Rik	1.03151		Gm9870	-1.73973
	Cd22	1.03		Fam57b	-1.73958
	Tom1l1	1.02954		Epha3	-1.73768
	Sde2	1.02533		Tpbg	-1.73502
	Safb	1.02332		Colec12	-1.73308
	Trav12n-2	1.01835		Zfp407	-1.72601
	Cd300lb	1.01685		Urm1	-1.72283
	Gpank1	1.01389		Defa3	-1.72187
	Chl1	1.01378		Rsrp1	-1.72173
	Prrt1	1.01365		4931414P19Rik	-1.71892
	B230118H07Rik	1.01257		1810021B22Rik	-1.71673
	Slc22a21	1.01122		Haghl	-1.71623
	1700031L13Rik	1.00766		Rb1	-1.71353
	Tbx3	1.00566		Helb	-1.71092
	Zfp277	1.00481		Myom2	-1.71043
	Sltm	1.00415		Gm3912	-1.71019
	Csf2rb	1.00112		Spag5	-1.70702
	Asb3	1.00081		Pla2g4c	-1.70682
	Mcm2	0.998389		Nhsl1	-1.70291
	Cep41	0.997955		Trmt10a	-1.7024
	Wasf2	0.99655		Csf1	-1.70082
	Cpxm2	0.993862		Fat2	-1.69772
	Ctdp1	0.991783		Esr1	-1.69584
	Crtac1	0.99013		Runx2	-1.69291
	Klhl40	0.987147		H2afj	-1.69228
	Izumo1	0.98623		Lgr4	-1.69217
	6030458C11Rik	0.985328		Smad7	-1.68921
	Fbxw18	0.985151		Tacr3	-1.68702
	C920006O11Rik	0.984384		Ern1	-1.68422
	Plek2	0.98331		Pnliprp2	-1.68292
	Rcsd1	0.982892		Wdr81	-1.68159
	9330111N05Rik	0.982775		Rab11fip1	-1.68113
	Fnbp1	0.982276		Syne2	-1.6804
	Stmnd1	0.980165		Tjp2	-1.68
	Il1rn	0.979326		Sgca	-1.67992
	4933416M07Rik	0.976941		Fas	-1.6799
	Olfr112	0.975063		Gfm2	-1.67483
	Ddah2	0.974867		Tnfrsf10b	-1.67189
	Cr1l	0.966926		Rnf41	-1.67179
	Osbpl10	0.966908		Shmt2	-1.67042
	Rbp2	0.966593		5730420D15Rik	-1.66967
	Hoxc5	0.958505		5330431K02Rik	-1.66899
	Abcb1b	0.955898		Wt1	-1.66828
	Rnf11	0.953594		Creld2	-1.66784
	Accsl	0.953326		Caps2	-1.65973
	Prss16	0.952128		Postn	-1.65647
	D6Ertd527e	0.951523		Abcf3	-1.65587
	Rbm6	0.947961		Zfp420	-1.65485
	Eif2ak1	0.947182		Chrna3	-1.65429
	Pih1d1	0.947155		Desi1	-1.65213
	Tex15	0.946648		Pard3	-1.6517
	Cep55	0.946003		Cdh8	-1.65151
	Cdc42bpa	0.94376		1700063D05Rik	-1.65145
	Agr2	0.943122		Sfi1	-1.64995
	Gm19710	0.941463		Pla2g6	-1.64813
	Ambra1	0.938677		Elfn2	-1.64196
	Gm14964	0.936079		Tcf12	-1.64077
	Rbm44	0.932815		Ms4a7	-1.64021
	Pou2f2	0.931895		Gm7969	-1.63679
	Plscr4	0.931602		Birc6	-1.63648
	Dock9	0.93098		9430053O09Rik	-1.63576
	Tradd	0.927765		Zfp58	-1.6342
	Ptgdr	0.927307		Tada3	-1.63396
	D830036C21Rik	0.926476		Flt1	-1.63316
	Mc5r	0.925558		Snapc3	-1.63306
	Tsnaxip1	0.923374		Bcl7a	-1.6326
	Cxcl10	0.920332		Zfp719	-1.63155
	Pou2af1	0.91792		Prr15	-1.63024
	Tcf25	0.917801		Ermp1	-1.62949
	Eif4ebp1	0.915736		Serpinb8	-1.62825
	Zdhhc4	0.915066		Ephb4	-1.62721
	Avpr1a	0.915062		Itch	-1.62509
	BC030870	0.914143		Slc19a2	-1.62425
	Acap1	0.911805		Gstt3	-1.62412
	Hoxd13	0.910844		Oosp3	-1.62377
	Prrc1	0.909678		AI839979	-1.62322
	A030014E15Rik	0.909388		Trim15	-1.62223
	Tbx2	0.906791		Gm19439	-1.6221
	Rbm11	0.906648		Ergic2	-1.62104
	Cactin	0.904747		Insm1	-1.61872
	9130410C08Rik	0.902291		Neurod4	-1.61569
	C230085N15Rik	0.899396		2610005L07Rik	-1.61538
	Tnfrsf11a	0.899107		Dio2	-1.61466
	Gpr6	0.898831		1700034P13Rik	-1.6144
	Myb	0.898682		Mrpl47	-1.61379
	Scyl3	0.895739		G2e3	-1.6132
	Atxn2	0.892767		Chpt1	-1.61288
	Obp2a	0.891055		Plekhf1	-1.61068
	Zfp644	0.889642		Ttc5	-1.6091
	Lst1	0.888713		Qser1	-1.60819
	Tnfaip6	0.884141		Dact1	-1.60793
	0610040B10Rik	0.882961		1700102P08Rik	-1.60737
	1600014C23Rik	0.882026		Timeless	-1.60672
	Phf11d	0.878867		Cyp4v3	-1.60633
	Zim2	0.873387		Fosl1	-1.60393
	Pars2	0.871495		Galnt3	-1.60266
	Stox2	0.871174		Cpsf2	-1.6019
	Brsk2	0.864585		Ggcx	-1.60188
	Barx2	0.862513		Elof1	-1.60034
	Gpx5	0.861441		Slc15a2	-1.59909
	E2f8	0.860774		Cd93	-1.59755
	Pkd2l2	0.85986		Smoc2	-1.59682
	4931415C17Rik	0.85643		Tap1	-1.59508
	Psg28	0.85426		Ccdc124	-1.59421
	Ccnb1	0.852767		Tmem186	-1.59152
	Cox8c	0.85211		Rab3il1	-1.59002
	Pbld1	0.851705		Zfp52	-1.58727
	Farp2	0.850489		Cstf2	-1.5851
	Taf7l	0.850299		4930573C08Rik	-1.58412
	Esyt3	0.848942		Yipf5	-1.58347
	Qprt	0.848616		Ifi30	-1.58234
	Cd27	0.847235		Elovl2	-1.58223
	Zfp93	0.847119		Pcdhb20	-1.58205
	Yipf7	0.84659		Eps15l1	-1.58109
	4933417C20Rik	0.845707		Mlst8	-1.57956
	Nek2	0.843926		Slc16a12	-1.57875
	Adamts9	0.841236		Rbpms	-1.57869
	Slitrk6	0.839269		2010001A14Rik	-1.57789
	Brcc3	0.839218		Fam83f	-1.5755
	Col18a1	0.838574		Eif4e2	-1.5751
	Eif3h	0.837719		Nlrc3	-1.57288
	Tdrd7	0.835946		Senp1	-1.57016
	Map3k7	0.835658		Rmdn1	-1.56994
	Hmcn1	0.835517		Vwc2	-1.56724
	Calu	0.834927		Irak1bp1	-1.56648
	Zfp292	0.834726		Tle3	-1.56527
	Hoxc6	0.834333		Sema3c	-1.56484
	Acy3	0.830736		Chodl	-1.56437
	Steap3	0.830029		Tmem185b	-1.56424
	Dkk1	0.828648		Rtel1	-1.56379
	Alg2	0.828459		Kat6b	-1.56293
	Creb3l4	0.82832		Gjb5	-1.55968
	Cep295nl	0.821121		Siae	-1.55908
	2200002D01Rik	0.820968		Pnpla1	-1.55873
	Gm14321	0.820168		4921536K21Rik	-1.55841
	4930524B15Rik	0.817494		1700008O03Rik	-1.55793
	Pcmtd1	0.816979		Ccdc71l	-1.55752
	Fam120b	0.815729		Abcb9	-1.55706
	0610033M10Rik	0.811619		Zfp213	-1.55635
	Stamos	0.808263		Zfp11	-1.55508
	Cln3	0.806648		Cyp1b1	-1.55428
	Sumo3	0.805406		Rtkn2	-1.55156
	Spata24	0.804156		Slc25a30	-1.55048
	Gm3227	0.803573		Slc4a5	-1.54921
	E330013P04Rik	0.80209		Ankrd24	-1.54697
	Timd2	0.802076		2810021J22Rik	-1.54669
	Zc3h12a	0.799859		Pcdhb21	-1.54518
	Fkbp14	0.798517		Rab39	-1.54466
	Bdh2	0.797209		2700081O15Rik	-1.54402
	Ugcg	0.796879		Slc6a1	-1.54356
	Ech1	0.795965		Inpp1	-1.54096
	Hoxa9	0.794809		Pcdh18	-1.5407
	Dsc1	0.793411		Ropn1l	-1.53997
	Creb5	0.791126		Ppp2r5c	-1.53979
	4933416O17Rik	0.789639		Nrg4	-1.5393
	Edn1	0.787784		Brdt	-1.53895
	Irx3	0.785431		Ifnar1	-1.53884
	Ap2a2	0.785051		Acss2	-1.53767
	Vps18	0.784973		Srd5a1	-1.53743
	Slco1a1	0.784822		Fanca	-1.53732
	Rnf213	0.784405		Tmem206	-1.53672
	A930012O16Rik	0.781981		Lrrc27	-1.53431
	Tmem121	0.781672		Hspa1a	-1.53388
	Pla2g4e	0.780775		Fbxl3	-1.53387
	Stat1	0.780563		Susd1	-1.53159
	Ctc1	0.780488		Vcl	-1.52985
	6030440G07Rik	0.780373		Ostc	-1.52962
	Dmwd	0.773896		Mplkip	-1.52887
	Tas2r105	0.771046		Pde6c	-1.5288
	Lrat	0.769995		Ppp3cc	-1.52846
	Pnldc1	0.768318		F2rl2	-1.5283
	Lrrc41	0.767406		Osmr	-1.52634
	Mllt11	0.764621		Vwc2l	-1.52482
	Armc8	0.760567		Nsg2	-1.52393
	Paupar	0.760455		Dcun1d5	-1.51934
	Slc13a1	0.758458		Tra2b	-1.51883
	Plcb4	0.75758		Ier5	-1.51781
	Sccpdh	0.755487		Trps1	-1.51694
	Gcnt7	0.754574		Gfod2	-1.51484
	Lhfpl3	0.75412		Igf1r	-1.51438
	Bcl2l12	0.752747		H2-Ab1	-1.51232
	Lrtm1	0.750518		Lrrc49	-1.51227
	Atp8b4	0.748413		Pxylp1	-1.51103
	9130019P16Rik	0.746873		Ptprj	-1.51079
	Acox2	0.746105		Ccdc141	-1.5107
	Ssr1	0.745208		Haus2	-1.51054
	Wrn	0.742969		Chrnb2	-1.50977
	Cyp2c39	0.742722		Nos1	-1.50748
	Sirt6	0.741772		Fgfr1	-1.50723
	Trmt112	0.740222		Pex6	-1.50613
	Slc22a3	0.739712		St8sia1	-1.50522
	H2afy3	0.737578		Ttll4	-1.50511
	4933402C05Rik	0.737487		Sik2	-1.50442
	5730412P04Rik	0.73585		Sec24c	-1.50441
	4930448D08Rik	0.732649		Ldlrap1	-1.50385
	Prdx6b	0.73249		Pik3c2a	-1.50183
	Akap4	0.731575		Nfxl1	-1.50133
	Tnfsf10	0.731001		Naip5	-1.50098
	Rims2	0.730322		Xkr8	-1.49907
	Adam4	0.729988		Fuca2	-1.49861
	Top1	0.728513		D130043K22Rik	-1.49849
	Gm12606	0.725475		4930444P10Rik	-1.49764
	Gimap7	0.723824		Gpr149	-1.49706
	Rgmb	0.722773		Ocrl	-1.49685
	Serpinb9d	0.721615		Cgrrf1	-1.49666
	Clasp1	0.721399		Arhgef33	-1.4952
	Pdrg1	0.720762		4930565D16Rik	-1.49329
	Atp2b3	0.719299		Emb	-1.49309
	Art2a-ps	0.718531		Gpt2	-1.49289
	4931431C16Rik	0.717478		Zfp786	-1.4927
	Dock1	0.717037		Smim6	-1.49207
	Mpz	0.714132		Zfp14	-1.48892
	Btnl9	0.712207		Pabpc5	-1.48777
	Cnksr1	0.711457		Dixdc1	-1.48722
	Enox1	0.710909		P4ha2	-1.48717
	Setmar	0.710874		A930005H10Rik	-1.48463
	4931406B18Rik	0.706454		Azin1	-1.48434
	Tll2	0.705633		Gper1	-1.48405
	Usp18	0.705373		Slc25a42	-1.48404
	Hbp1	0.699834		Gmip	-1.48244
	Scfd1	0.69927		Pds5b	-1.48203
	Tmem150c	0.696568		Nat14	-1.48025
	Hdhd2	0.693932		Tmppe	-1.48005
	Olfr71	0.693822		Cyp2s1	-1.4798
	Myom3	0.69192		Klhl1	-1.47857
	Plod2	0.691524		Zfp141	-1.47777
	Mrgpra1	0.69134		Prok2	-1.4776
	Ciart	0.689638		Dennd6a	-1.47715
	Cyp2b13	0.688339		Plin5	-1.47673
	Dcx	0.688004		Cacna2d1	-1.4766
	Cand1	0.687951		Afap1l2	-1.47652
	Tm7sf3	0.687742		Ankrd17	-1.47639
	Rln1	0.686657		Trp53i11	-1.47631
	Chrna9	0.685647		Plin4	-1.47617
	Riok1	0.685483		Lpo	-1.47613
	Cytip	0.685421		4833420G17Rik	-1.47529
	Trpv2	0.684038		Gm26911	-1.47528
	Sprr1a	0.684014		Angptl2	-1.47528
	Slc34a1	0.683792		Sclt1	-1.47455
	Cbx4	0.682876		Ccdc167	-1.4736
	Itgae	0.681462		Tmem138	-1.47214
	Stk31	0.681218		Adig	-1.47171
	Ssx2ip	0.678797		Pdzd8	-1.47111
	Treh	0.674907		Edrf1	-1.47033
	Zdhhc1	0.672114		Tpmt	-1.46953
	Impdh1	0.66817		Ccny	-1.4695
	Tcfl5	0.66719		Gas8	-1.46919
	Il5	0.666578		Arl13b	-1.46831
	Pak7	0.665926		Tmem38b	-1.46786
	Hmx3	0.665331		Gem	-1.46747
	Vgll4	0.664691		Zfp935	-1.46675
	B230219D22Rik	0.664454		Cog5	-1.46635
	Mycs	0.662761		Prss23	-1.46595
	4933406J09Rik	0.654044		Prr11	-1.46591
	Gtpbp6	0.653124		Car13	-1.46314
	Abca2	0.652517		Myh4	-1.46017
	4933411G06Rik	0.652204		Pla2g10	-1.4601
	1500005C15Rik	0.651484		Lrpap1	-1.45906
	Gpr171	0.650833		Nkx2-9	-1.45897
	Atp8b2	0.646773		AB124611	-1.45697
	Efcab2	0.644233		Rdh14	-1.45675
	Tmem45b	0.64419		Pggt1b	-1.45652
	Wfikkn1	0.64382		Prkd3	-1.45546
	Slc6a20b	0.639936		Rcor3	-1.45534
	Fbxo36	0.637527		Pmaip1	-1.45474
	Il2rg	0.635271		Ahnak2	-1.45474
	Pde6g	0.626553		Dpm3	-1.4547
	Aldoa	0.614416		Cebpg	-1.45433
	Krtap13	0.613713		Ccnc	-1.45364
	Lactbl1	0.613463		Abcc5	-1.45165
	Man1b1	0.612968		Pdgfb	-1.45097
	Ufm1	0.611166		Exosc6	-1.44945
	Olfr701	0.6105		Fbxo22	-1.44825
	Dph1	0.609921		Rttn	-1.44733
	Ecm2	0.608218		Palld	-1.44707
	Tyr	0.605485		Gdf11	-1.44693
	Hrg	0.605216		Ptch2	-1.44625
	Hdgfl1	0.599507		A230009B12Rik	-1.44515
	Thoc7	0.592223		Chchd7	-1.4448
	Actl11	0.584389		Ccnt2	-1.44305
	Cdk19	0.583753		Atp6v1g1	-1.443
	4933433N18Rik	0.563822		Abcg3	-1.44194
				Zwint	-1.44131
				Gm11696	-1.4412
				Msantd3	-1.44075
				Prr15l	-1.43969
				Ercc4	-1.43899
				Jag1	-1.4385
				Zxda	-1.4383
				Mgme1	-1.43743
				Mbd4	-1.43708
				Yes1	-1.43675
				Klf10	-1.43543
				S100a3	-1.4351
				Plcg1	-1.43428
				Tmem107	-1.43399
				Capn10	-1.43273
				Dbil5	-1.43187
				4930481A15Rik	-1.43109
				Snx19	-1.43063
				Tmtc3	-1.42959
				Cyp26b1	-1.42958
				Radil	-1.42943
				Htr5b	-1.4281
				Dtd2	-1.42809
				Golga1	-1.42742
				Golgb1	-1.42724
				Zfp599	-1.42696
				Ier3	-1.4262
				Cybc1	-1.42599
				P2ry14	-1.42538
				Eml6	-1.42469
				Ndufab1	-1.42446
				Nfya	-1.42417
				Btbd19	-1.42369
				Wdr92	-1.42347
				Ranbp17	-1.42325
				4930447F24Rik	-1.42146
				Srpk2	-1.41967
				Zfp668	-1.41945
				Lrch1	-1.41838
				Tnc	-1.41769
				Atp6v0a2	-1.41693
				Dhx35	-1.41669
				Gnl3l	-1.41663
				Pvr	-1.41658
				Msantd4	-1.41291
				Dph5	-1.41213
				Tha1	-1.41129
				Gkn3	-1.40923
				Rsad2	-1.40753
				Foxh1	-1.40747
				Itpkb	-1.40623
				Car15	-1.40563
				Tert	-1.40509
				Clec2d	-1.4044
				Ddx58	-1.4035
				Mid1	-1.40312
				Afap1	-1.40137
				Setdb2	-1.40004
				Rtbdn	-1.39945
				Sfxn2	-1.39883
				Prkdc	-1.39881
				Ddx27	-1.39875
				Klhl10	-1.39687
				Cnnm4	-1.39645
				Cpt1a	-1.39456
				Rad51c	-1.39359
				Eif2ak4	-1.39336
				Trabd	-1.39333
				Uhmk1	-1.39265
				Etaa1	-1.39232
				Tiparp	-1.39202
				Zfp341	-1.392
				Zfp825	-1.39193
				Zfp748	-1.39082
				Nfe2l3	-1.39081
				Nepro	-1.39046
				Fam3a	-1.38992
				Crxos	-1.38933
				Klkb1	-1.3889
				Ngfr	-1.38882
				Supt20	-1.38754
				Tbx21	-1.38642
				Pfpl	-1.38514
				Dna2	-1.38395
				Cyp7b1	-1.38299
				Cntn2	-1.37986
				Zfp572	-1.37834
				Pdia5	-1.37797
				Slc11a2	-1.37769
				Rnf169	-1.37641
				Irf1	-1.37622
				Rab36	-1.37594
				Pnma5	-1.37585
				4921530L21Rik	-1.37544
				Maats1	-1.37451
				Pdlim1	-1.37444
				4930430F08Rik	-1.37328
				Zfp92	-1.37301
				Skap1	-1.37266
				Htatsf1	-1.37254
				Patz1	-1.37199
				Eva1a	-1.37194
				Dtl	-1.37177
				Dlx5	-1.3716
				1700081H04Rik	-1.37135
				Cd40lg	-1.37132
				S100a4	-1.37094
				Lipg	-1.3704
				Rbm26	-1.36977
				Dnm2	-1.36899
				Exoc3l2	-1.36733
				Rassf8	-1.36729
				Ccdc171	-1.36718
				Cabp7	-1.36648
				Chek2	-1.36646
				4930594C11Rik	-1.36429
				Rabgap1	-1.36403
				Dock8	-1.36387
				Ppp1r3c	-1.36354
				Ackr3	-1.36348
				Srsf3	-1.3634
				Casp1	-1.36297
				Tnp1	-1.36281
				2900022M07Rik	-1.36234
				Prr22	-1.36226
				Plekhg3	-1.36207
				Dpys	-1.36204
				Alx1	-1.3594
				Fbrsl1	-1.35908
				Kras	-1.35784
				Ak7	-1.35736
				Dusp5	-1.35656
				Atxn3	-1.35424
				Acnat2	-1.35361
				4933406C10Rik	-1.35246
				Fam204a	-1.35239
				Ppcdc	-1.35108
				Sap30	-1.3494
				Pi16	-1.3492
				Zfp36l1	-1.34896
				Spata9	-1.34888
				Eaf1	-1.34801
				Klhl14	-1.34747
				Rad18	-1.34734
				Elf1	-1.34641
				Golt1a	-1.34595
				Upb1	-1.34566
				Hgd	-1.34514
				Trim27	-1.34499
				Scn7a	-1.34476
				Lrrc1	-1.34362
				Trib3	-1.34328
				Neurl1b	-1.34279
				Mynn	-1.34232
				Gm13999	-1.33987
				Slc9a3r2	-1.33919
				Gm20754	-1.33846
				Zfp160	-1.33816
				Ucma	-1.33758
				Aen	-1.33738
				Inhba	-1.33673
				Gm11487	-1.33604
				BB557941	-1.33593
				Calcrl	-1.33551
				Traf3	-1.33549
				Ttc39b	-1.33376
				Prdx6	-1.33336
				Tnrc6c	-1.33292
				Cdh4	-1.33241
				Cib2	-1.33174
				4930529K09Rik	-1.33154
				Camk2a	-1.33135
				Dirc2	-1.33089
				Pkd2	-1.33075
				Col23a1	-1.32983
				Chrdl2	-1.32775
				Ccdc66	-1.32761
				Esyt2	-1.32704
				Samsn1	-1.32622
				Hs3st3b1	-1.32589
				Slc7a7	-1.32449
				Gulp1	-1.32421
				Mc1r	-1.3236
				Ksr1	-1.32309
				Ormdl1	-1.32224
				Gle1	-1.32204
				Elmo2	-1.32059
				Slc27a5	-1.31996
				Ska1	-1.3198
				Spty2d1	-1.31904
				Lamc3	-1.31897
				2410003I16Rik	-1.31838
				4933417O13Rik	-1.31799
				Skil	-1.31616
				Hip1	-1.31615
				Cdkn2aip	-1.31552
				Mtor	-1.3152
				AF366264	-1.31515
				Fgd6	-1.31504
				Ovol1	-1.31446
				Gpr61	-1.31424
				Trim43a	-1.31422
				Tanc1	-1.31361
				Creb3l1	-1.31313
				Ttc7	-1.31281
				Mttp	-1.31275
				Piwil2	-1.31265
				Gm14057	-1.31191
				Coasy	-1.31124
				Git2	-1.31041
				Cftr	-1.30976
				Npas2	-1.30821
				Dis3l2	-1.30771
				Lrba	-1.30724
				Cxxc4	-1.30718
				Robo3	-1.30717
				Anapc7	-1.30715
				Usp54	-1.30691
				Abo	-1.3068
				Ahctf1	-1.30599
				Cbln4	-1.3056
				Mpp7	-1.30523
				4921522P10Rik	-1.30451
				Wfdc3	-1.3039
				Ndst2	-1.30334
				1700036A12Rik	-1.30325
				Gm5129	-1.3031
				Cdh10	-1.30276
				Kcnk15	-1.30261
				Muc13	-1.30206
				Tmem160	-1.30133
				Gm9885	-1.30091
				Mettl24	-1.30085
				Entpd7	-1.29884
				Myo1a	-1.2979
				Asb6	-1.29789
				Htra3	-1.29719
				Fgf23	-1.29676
				Pkd1	-1.29626
				Lrfn1	-1.29613
				Xpc	-1.29522
				Tnfrsf9	-1.29378
				2310015A10Rik	-1.29311
				Fkbp11	-1.29306
				Pbx3	-1.29208
				Col6a1	-1.29139
				Pabpn1	-1.29136
				Nudt5	-1.29065
				Tnnc2	-1.29059
				Snx9	-1.28978
				Zfp661	-1.2892
				Trib2	-1.28919
				Myo1g	-1.28914
				4930515G01Rik	-1.28892
				Fbxl20	-1.2883
				Trim17	-1.28801
				Hif1an	-1.28775
				1700020G03Rik	-1.28624
				Hspa5	-1.28585
				Dcun1d1	-1.28575
				Sec22a	-1.28246
				Zfp142	-1.28209
				Crnde	-1.28205
				Prr27	-1.28181
				Rassf4	-1.28171
				Fgfr4	-1.28166
				D430013B06Rik	-1.28165
				Cys1	-1.28131
				Pim1	-1.28125
				Grpr	-1.28076
				4833439L19Rik	-1.28056
				Naip2	-1.28047
				Lfng	-1.28012
				Foxl2	-1.27982
				Zbtb42	-1.2795
				Atox1	-1.27874
				Srebf1	-1.27849
				Cideb	-1.27845
				Crispld2	-1.27823
				Ptpn13	-1.27817
				Col4a1	-1.27719
				Phka2	-1.27673
				Aim2	-1.27606
				Abcd2	-1.27565
				Zc2hc1b	-1.2753
				Sec61a1	-1.27384
				Dnajc13	-1.27336
				Hrh3	-1.2727
				Gpt	-1.27243
				Atp11c	-1.27185
				Nedd9	-1.27106
				Ttll5	-1.27073
				6030445D17Rik	-1.26989
				Pbk	-1.26984
				Ate1	-1.26947
				Iars2	-1.26926
				4930535I16Rik	-1.26882
				Brwd3	-1.267
				Dcakd	-1.26615
				Prss56	-1.26566
				Acot4	-1.26488
				Rbm46os	-1.26393
				Zfp521	-1.26385
				6430590A07Rik	-1.26379
				Fam219a	-1.26369
				St8sia4	-1.26285
				Emilin2	-1.26239
				Ly6d	-1.26173
				Fchsd1	-1.26147
				Ggt1	-1.26107
				Myo18b	-1.26064
				A330023F24Rik	-1.26034
				4933428M09Rik	-1.26019
				Morc3	-1.25957
				Nfam1	-1.2585
				Specc1	-1.25827
				Serpinb6e	-1.25822
				Timp3	-1.25776
				Adam33	-1.2574
				Ammecr1l	-1.2568
				Gm15972	-1.25672
				Eme2	-1.25642
				Pus3	-1.25602
				Gse1	-1.25499
				Ankrd50	-1.25493
				Adora2b	-1.25445
				Mecp2	-1.25388
				Utp14a	-1.25282
				Ak1	-1.25275
				Cenpb	-1.25228
				Afm	-1.2522
				Sun2	-1.25211
				Fam53b	-1.25181
				Cpped1	-1.25072
				Kdm5a	-1.24944
				Sfmbt2	-1.24852
				Atrx	-1.24803
				Tnpo1	-1.24787
				0710001A04Rik	-1.24783
				Cnpy4	-1.2477
				Scamp2	-1.24719
				4933413J09Rik	-1.24649
				Wtip	-1.24637
				Lmnb1	-1.24541
				Ccnf	-1.24533
				Lamp2	-1.24454
				Arhgef17	-1.24424
				Bcl9l	-1.24285
				Mblac2	-1.24156
				Col6a4	-1.24137
				Gdf5	-1.24059
				Tmem179b	-1.24036
				Rfx2	-1.24022
				AU015791	-1.24015
				Tmem19	-1.23921
				Nr1i3	-1.23878
				Ppp1r8	-1.23853
				Plagl1	-1.2385
				Ankrd10	-1.23838
				Zcchc4	-1.23759
				Trak2	-1.23737
				Pdxk	-1.23729
				Eri1	-1.23545
				Dync2h1	-1.23544
				4930592C13Rik	-1.23534
				Cep57l1	-1.23511
				B230334C09Rik	-1.2348
				Mapre1	-1.23451
				Ncapd2	-1.23423
				A4galt	-1.23417
				Zfp68	-1.23417
				Fbxl8	-1.23335
				Slco5a1	-1.23288
				Mcph1	-1.23276
				Kif4	-1.23261
				Ube2v2	-1.2322
				Rab11b	-1.2317
				Dzip3	-1.23157
				AI854703	-1.23141
				Krt2	-1.23094
				Phka1	-1.22982
				Rhbdf1	-1.22918
				Mettl4	-1.22894
				Dnajc1	-1.22887
				Nme8	-1.22846
				Lgals4	-1.22832
				Actr1a	-1.22803
				Tpm2	-1.22778
				Stc1	-1.2276
				Kif13a	-1.22671
				Uba1	-1.22631
				Rmi2	-1.22606
				Rgs19	-1.22579
				Pnmt	-1.22562
				Csmd3	-1.22553
				Prokr2	-1.22485
				Ano1	-1.22474
				5530601H04Rik	-1.22376
				Gpr107	-1.22373
				Xpo7	-1.22355
				Nrarp	-1.22302
				Kank2	-1.2227
				Galnt10	-1.22223
				Blvrb	-1.22114
				Shisa7	-1.22082
				A230056P14Rik	-1.22077
				Cherp	-1.21988
				Spata1	-1.21923
				3110009E18Rik	-1.21917
				Arl11	-1.21877
				Ankrd6	-1.21841
				Thbd	-1.21839
				Lrch3	-1.21812
				Zbtb33	-1.21656
				Dvl2	-1.21645
				Sox11	-1.21501
				BC025920	-1.21481
				Atp2c1	-1.21471
				Alox12b	-1.21423
				Plcz1	-1.21411
				Diexf	-1.21371
				Lyg1	-1.21363
				Il1bos	-1.21336
				Cd80	-1.21328
				Krt7	-1.21262
				Slc37a4	-1.21253
				Ube3c	-1.21216
				Psg19	-1.21215
				Ldlrad4	-1.21199
				Tgif1	-1.21196
				Cpb2	-1.21113
				Sc5d	-1.2108
				Inip	-1.20981
				Six3os1	-1.20926
				4930448E22Rik	-1.20899
				Rilpl2	-1.2086
				Capsl	-1.2084
				H2afb1	-1.20767
				Nasp	-1.20723
				Cenpj	-1.20699
				Smc2	-1.20642
				Trmu	-1.20544
				Rgl2	-1.20541
				Akr1e1	-1.20494
				2810404M03Rik	-1.20474
				Pik3ip1	-1.20473
				Cdc25c	-1.20298
				Gjb6	-1.20291
				Cd24a	-1.20275
				Gm7444	-1.20264
				Impg1	-1.20251
				Gapvd1	-1.20171
				4930465M20Rik	-1.20141
				Tac1	-1.20117
				Arap3	-1.20103
				Ewsr1	-1.20027
				Cox5b	-1.19912
				Ggnbp1	-1.19867
				4933417A18Rik	-1.19795
				Arfgap3	-1.1974
				Zmynd15	-1.19611
				Mybphl	-1.19531
				Akr1c18	-1.19453
				Tspan10	-1.19412
				Zdhhc18	-1.19409
				Alox5	-1.19375
				Stk32a	-1.19311
				Cdca8	-1.19264
				F13a1	-1.1906
				4833427G06Rik	-1.19025
				Fignl1	-1.1896
				Slc25a12	-1.18948
				Neurod2	-1.18923
				Ercc1	-1.18878
				Spon1	-1.18855
				Frem1	-1.18841
				Myoz1	-1.18815
				Aph1b	-1.18799
				Zfp619	-1.18784
				Kcnmb2	-1.18687
				Pih1d2	-1.1868
				Polr3f	-1.18663
				A930004J17Rik	-1.18599
				B430319H21Rik	-1.18581
				Kif3b	-1.18551
				Fxyd4	-1.18508
				Aifm2	-1.18506
				4930445B16Rik	-1.18417
				Srek1	-1.18272
				1700123K08Rik	-1.1826
				Leng9	-1.18248
				Hfe	-1.18227
				Prune2	-1.18102
				Dyrk3	-1.18063
				Clcnkb	-1.18029
				Rhcg	-1.18026
				Gpr108	-1.17956
				Gm6277	-1.17919
				Tpd52l2	-1.17888
				3300002A11Rik	-1.17864
				Acsbg1	-1.17811
				Pkp2	-1.17803
				Theg	-1.17719
				Zmynd8	-1.17714
				Fastkd2	-1.17667
				Marco	-1.17656
				Armc4	-1.17497
				Hmgcs2	-1.17393
				Cntd1	-1.17344
				1700052I22Rik	-1.17306
				Cpne3	-1.17274
				Tssk2	-1.17263
				Swt1	-1.1724
				Atp6v1b1	-1.17231
				Fgd4	-1.17188
				Cdc40	-1.17185
				Retnla	-1.17139
				Prss8	-1.17127
				Btd	-1.1705
				Dhx57	-1.16982
				Cnga2	-1.16963
				Opn4	-1.16953
				Vil1	-1.16927
				Cyp20a1	-1.16875
				Usp24	-1.16821
				Cd86	-1.16805
				Inpp5f	-1.16765
				Bhlha15	-1.16697
				2310015K22Rik	-1.1667
				Rrm2	-1.16656
				Stx6	-1.16648
				Grin3a	-1.16585
				Zc3h4	-1.16556
				Adamtsl3	-1.16533
				5830468F06Rik	-1.16504
				Timp4	-1.16456
				Ap5z1	-1.16453
				Ptpn12	-1.16414
				Zbtb8a	-1.16364
				Catsper1	-1.16329
				Btrc	-1.16313
				Rab38	-1.16273
				Kif13b	-1.16266
				Mafg	-1.16249
				Il12b	-1.16237
				Ola1	-1.1617
				Ttc28	-1.1616
				Mertk	-1.16149
				Notch3	-1.1606
				Cd2	-1.16017
				Ifitm3	-1.16002
				Ppp1cb	-1.15998
				Omd	-1.1599
				Tma16	-1.15957
				Tuba8	-1.15953
				Tango2	-1.15915
				Ptprd	-1.15879
				Mrpl1	-1.15873
				Pick1	-1.15826
				Gprc6a	-1.15774
				1700099I09Rik	-1.15767
				Ccm2l	-1.15766
				Ttc17	-1.15723
				Ceacam10	-1.15687
				Cilp2	-1.15581
				Tarbp2	-1.15467
				3110045C21Rik	-1.15465
				Phf8	-1.15433
				Fxyd5	-1.15423
				E430018J23Rik	-1.15397
				Smim20	-1.1537
				4933435G04Rik	-1.15269
				Dda1	-1.15226
				Mndal	-1.15195
				Tmem200a	-1.15191
				3110080O07Rik	-1.15175
				Ddr1	-1.15066
				Grip1	-1.15051
				Dst	-1.15034
				Igtp	-1.14994
				Mettl25	-1.14994
				Manba	-1.14878
				Pcf11	-1.14812
				Pcolce	-1.1468
				Rsad1	-1.14639
				Pxn	-1.14639
				Gstp3	-1.1452
				Rin1	-1.14489
				Catsperd	-1.14482
				Rpl7l1	-1.14462
				Tecta	-1.14459
				Pde3a	-1.14344
				Cnn3	-1.14267
				P4htm	-1.1423
				Slc2a4	-1.14192
				Foxi1	-1.14141
				Rnf115	-1.14111
				Pqlc1	-1.14109
				Ccne1	-1.14001
				Spata5	-1.13983
				D030018L15Rik	-1.13934
				Reep1	-1.1387
				Midn	-1.13861
				Lmx1a	-1.13733
				Pcdhb15	-1.13728
				Dpm1	-1.13673
				Rab2a	-1.13673
				Prl3b1	-1.13643
				Igf2bp3	-1.13598
				Tatdn1	-1.13548
				Shisa6	-1.13469
				Tsc22d2	-1.13452
				4930579G24Rik	-1.13451
				Pdp1	-1.1333
				Acsm3	-1.13284
				Epn1	-1.13276
				Fars2	-1.13273
				Cbfa2t3	-1.13257
				Ssh2	-1.13165
				Col10a1	-1.1316
				Kidins220	-1.13144
				Trhr	-1.13142
				Tpra1	-1.1311
				Odf2	-1.13085
				Nin	-1.13071
				Rinl	-1.13056
				Spef1	-1.13043
				2810047C21Rik1	-1.12998
				Brix1	-1.12991
				Stag1	-1.12879
				Myo1b	-1.12854
				Rps27l	-1.12853
				Ccar1	-1.1281
				Pax8	-1.12801
				Dbx1	-1.12796
				Rgs13	-1.12755
				Cenpa	-1.1275
				Endou	-1.12644
				Rev3l	-1.12633
				Bbx	-1.1262
				Gpr161	-1.12606
				Gm11767	-1.12572
				Rprd1b	-1.12539
				Fbxo15	-1.12389
				Srsf10	-1.1237
				4930503B20Rik	-1.12273
				Rmdn2	-1.12249
				Nrp2	-1.12223
				Urah	-1.12222
				Gak	-1.12221
				Cmtm6	-1.12198
				Ndor1	-1.12179
				Tro	-1.12148
				8030453O22Rik	-1.1201
				Sf3a1	-1.12006
				Gk2	-1.11992
				Apcdd1	-1.11985
				Tenm4	-1.11905
				Speer5-ps1	-1.11824
				Pik3cd	-1.11821
				Crot	-1.11798
				Mcm10	-1.11795
				Tspan1	-1.11778
				Zfp398	-1.11711
				Prkab2	-1.1166
				C230021G24Rik	-1.11654
				Atxn7l1	-1.11648
				Zfp958	-1.11627
				Brca1	-1.11619
				Rnf165	-1.11555
				Map3k14	-1.11527
				Atp5g1	-1.11518
				Th	-1.11489
				Lcp1	-1.114
				Tfdp2	-1.11353
				Fut4	-1.11334
				B3gnt3	-1.1131
				Dhcr24	-1.1128
				Cd99l2	-1.11277
				Itih2	-1.11273
				Clvs2	-1.11264
				H2-M9	-1.11251
				Fstl3	-1.11248
				Nkain1	-1.11192
				Ccdc28b	-1.11139
				Nt5c3b	-1.11137
				Gas2l1	-1.11125
				Inppl1	-1.11122
				Taf2	-1.11012
				Rapsn	-1.11007
				S1pr3	-1.10968
				C130079G13Rik	-1.10955
				Irak2	-1.10872
				Msl1	-1.10799
				Wdr66	-1.10794
				Tgfbr3	-1.10785
				Zfp57	-1.10762
				Rad54l2	-1.10743
				Slc5a6	-1.1074
				Map3k2	-1.10735
				C330024D21Rik	-1.10715
				Rbm12b2	-1.10701
				Ddias	-1.10663
				Syt17	-1.10662
				Cpne7	-1.1066
				Utp15	-1.10621
				1700094J05Rik	-1.10613
				Gadl1	-1.10568
				Alpl	-1.10554
				Olfr16	-1.10547
				Doc2b	-1.10523
				Ahdc1	-1.10523
				Eif4ebp2	-1.10495
				Rnf180	-1.10491
				Bin1	-1.10479
				Agfg1	-1.10471
				Imp4	-1.10469
				Mos	-1.10465
				Gm11346	-1.10445
				Ralgapa1	-1.10428
				4933425B07Rik	-1.10406
				Suv39h2	-1.10388
				4930577N17Rik	-1.10382
				Mettl3	-1.10352
				Nfat5	-1.10347
				Zfp433	-1.10264
				Gpnmb	-1.10229
				Ryr3	-1.10225
				Fdft1	-1.10193
				Cpsf7	-1.10177
				Suco	-1.10165
				Cd55	-1.10127
				Polr3k	-1.10118
				Zfp809	-1.10032
				Scmh1	-1.09963
				Vdr	-1.09922
				Wdfy3	-1.09908
				Pdzk1ip1	-1.09871
				Snx18	-1.09822
				Alkbh2	-1.09794
				Ptprg	-1.09774
				Selp	-1.09735
				Rngtt	-1.09684
				Gys2	-1.09669
				Ice1	-1.09657
				Slc29a2	-1.09614
				2610044O15Rik8	-1.09612
				Pcdhgc4	-1.09498
				Fnip1	-1.0941
				Rasa1	-1.09324
				Sh3bp1	-1.09324
				Atp1a1	-1.09303
				Tbata	-1.09293
				Ppp1r12c	-1.09289
				Dhh	-1.09214
				Pitpnm2	-1.09159
				Sppl2a	-1.09118
				Sema3e	-1.09113
				Dbt	-1.09048
				Fut11	-1.09022
				Kdm2a	-1.08988
				Il1rap	-1.08944
				Enc1	-1.08848
				Mprip	-1.08839
				Lman2l	-1.08787
				Wdfy4	-1.08747
				Serac1	-1.08719
				Rilpl1	-1.08711
				4930405N21Rik	-1.087
				Rnf149	-1.08692
				Rhbdl1	-1.08646
				Rbm15b	-1.08646
				Nsmf	-1.08635
				D10Jhu81e	-1.08616
				Tgfbr1	-1.08591
				Spint1	-1.08579
				Nsun4	-1.08564
				Elk1	-1.08554
				4933424M12Rik	-1.08513
				Jun	-1.08511
				Zmynd12	-1.08488
				Hadhb	-1.08475
				Sorbs2	-1.08414
				Ube2f	-1.08385
				Cln8	-1.08375
				Tmem29	-1.08365
				Calm4	-1.08342
				Kdelr1	-1.08323
				Ctsh	-1.08244
				Slc38a2	-1.08217
				Klf12	-1.08174
				Slc38a10	-1.08131
				Ankrd54	-1.08131
				4930517O19Rik	-1.08116
				C1qc	-1.08101
				Cpsf6	-1.081
				Nfil3	-1.08096
				Cuedc1	-1.08072
				Dip2a	-1.08042
				Repin1	-1.07974
				Phgdh	-1.07922
				Dcp1b	-1.07871
				Siva1	-1.07863
				Cib4	-1.0786
				A930028O11Rik	-1.07836
				Fam117b	-1.07798
				Krt19	-1.0776
				Dhrs7	-1.07751
				Mrpl50	-1.07733
				Spz1	-1.07727
				Taok3	-1.07706
				Cep104	-1.07654
				Ciita	-1.07654
				Sall1	-1.07616
				Tbc1d5	-1.07569
				Sdccag8	-1.07562
				Tnnt3	-1.07478
				Ms4a6b	-1.07475
				Ccnd2	-1.07461
				Pcnx	-1.07416
				Atxn10	-1.07377
				Tigd2	-1.07372
				Ahsa2	-1.07364
				Retnlb	-1.07353
				Sorcs1	-1.0734
				Nr4a3	-1.07291
				Ulbp1	-1.0725
				Ctnna3	-1.07233
				Brwd1	-1.07229
				Orc2	-1.07225
				Slc6a12	-1.07197
				Fuz	-1.07184
				Myoz3	-1.07158
				Zbtb40	-1.07148
				Mfsd1	-1.07124
				Peli1	-1.071
				Actn3	-1.07062
				Rabif	-1.07041
				Vps13a	-1.07041
				Rtn4ip1	-1.07018
				Golph3	-1.06945
				Ythdf3	-1.06937
				Notch1	-1.06937
				Pou6f2	-1.06922
				Trib1	-1.0692
				4930451I11Rik	-1.0691
				H2-Bl	-1.06896
				Fgf21	-1.06895
				Rbm12	-1.06829
				1810012K16Rik	-1.0681
				Insig2	-1.06742
				4930599N24Rik	-1.06734
				Wwp2	-1.06724
				Nmnat3	-1.06675
				Rnf24	-1.06663
				Rgcc	-1.0665
				Abcg1	-1.06634
				Slc35c1	-1.066
				Sema4b	-1.0656
				Pdpn	-1.06505
				Fgf16	-1.0648
				Shq1	-1.06476
				Aktip	-1.06468
				C2cd5	-1.06413
				Mmp14	-1.06388
				Ccdc22	-1.06346
				Hnrnpul1	-1.06345
				Ptges	-1.06329
				Plekha4	-1.06281
				4632404H12Rik	-1.06273
				Gemin5	-1.06238
				Prss40	-1.06214
				Zfp772	-1.06201
				Sox15	-1.06192
				Snx5	-1.06116
				Huwe1	-1.06082
				Per3	-1.06076
				2810404F17Rik	-1.06068
				Cidec	-1.06034
				Pclo	-1.06032
				Cdc25a	-1.06009
				Fbxo6	-1.0599
				4930449C09Rik	-1.05933
				Capn15	-1.05908
				Phf21b	-1.05888
				Irf2	-1.05887
				Specc1l	-1.05861
				Spata16	-1.0584
				Ttll10	-1.05824
				Mepe	-1.05803
				Shprh	-1.0578
				Ulk1	-1.05768
				Erbb2	-1.05726
				Eif2ak3	-1.0569
				A630072M18Rik	-1.05673
				Pign	-1.05622
				Kmo	-1.05562
				Drd2	-1.05561
				Crb1	-1.05493
				Racgap1	-1.05474
				Tex33	-1.05468
				Gabbr1	-1.05437
				Frzb	-1.05422
				Cdc73	-1.05397
				Timp1	-1.05377
				Gjc2	-1.05281
				Coq5	-1.05277
				Kif24	-1.05245
				Agpat3	-1.05244
				Acot1	-1.05241
				Magea4	-1.05195
				Atf7ip2	-1.05192
				Zbtb20	-1.05161
				Gusb	-1.05147
				Lce3b	-1.05118
				Clp1	-1.05115
				Met	-1.05111
				Tnk1	-1.05097
				Aars2	-1.05084
				Cmah	-1.05054
				Dapp1	-1.05054
				Hebp2	-1.05039
				Zfp790	-1.05017
				0610010F05Rik	-1.04973
				Pdcd11	-1.04957
				Dmrt1	-1.04946
				Cotl1	-1.04929
				Tmem245	-1.04909
				Tmem40	-1.04886
				Tax1bp3	-1.04873
				Armc12	-1.04868
				Nkain4	-1.04854
				Gart	-1.04806
				Zfp759	-1.04767
				Cgnl1	-1.04747
				Nhlrc2	-1.04705
				Il31ra	-1.04631
				Mis12	-1.04622
				Fam122a	-1.04596
				Cd40	-1.04548
				Dlc1	-1.04532
				Aff1	-1.04523
				Mlh3	-1.04511
				Il1f8	-1.0449
				Syngr1	-1.0448
				Rab12	-1.0437
				Mcc	-1.04365
				Adm	-1.04351
				Tshz2	-1.04288
				Dhfr	-1.04272
				1700012D14Rik	-1.04235
				Dnajc3	-1.042
				Scn3b	-1.04134
				Mmp7	-1.04124
				Kifc3	-1.04115
				Tspan18	-1.0411
				4930453N24Rik	-1.04021
				Ddx39b	-1.04007
				Bmpr1a	-1.03987
				Tank	-1.03847
				2900076A07Rik	-1.03827
				Alox12	-1.03784
				Dnmt3a	-1.03774
				Hoxd11	-1.03769
				Akr1b10	-1.03746
				Gtpbp8	-1.03741
				Pcdhb6	-1.03741
				Dcdc2b	-1.03708
				Cdk7	-1.037
				Rab8b	-1.03677
				Smcp	-1.03643
				Gm20767	-1.0363
				5430430K15Rik	-1.03626
				Vps13d	-1.03608
				Bfsp2	-1.03608
				Tbx4	-1.03505
				Zdhhc3	-1.03497
				Sec61a2	-1.0349
				4933412O06Rik	-1.03465
				1700029J07Rik	-1.03427
				Gstt1	-1.03401
				Lrrn1	-1.03374
				N4bp2	-1.03339
				Elf2	-1.03335
				B3galnt2	-1.03315
				Obox6	-1.03275
				Zfp672	-1.03255
				Plaa	-1.03228
				Calcoco2	-1.032
				Aqp11	-1.03195
				Pla2g1b	-1.03144
				Pagr1a	-1.03131
				Tmem210	-1.03128
				Npb	-1.03127
				Pmepa1	-1.03125
				Cog7	-1.03102
				Ikzf3	-1.03056
				Ifi44l	-1.03036
				Trim26	-1.03021
				Plekhm1	-1.0299
				Gipc3	-1.02966
				Rap2a	-1.02901
				Nle1	-1.02864
				Dspp	-1.02862
				Opn1mw	-1.02837
				Mettl7a2	-1.02826
				Casp12	-1.02819
				Fanci	-1.02816
				Rrbp1	-1.02803
				Cyp4f39	-1.02794
				Sdf2l1	-1.02724
				Arpc5l	-1.02688
				Ms4a4c	-1.02686
				Parvb	-1.02671
				Slc39a4	-1.02663
				Tpgs2	-1.02624
				Pik3r3	-1.02621
				Vit	-1.02603
				Panx3	-1.02582
				Nif3l1	-1.02577
				Zfp111	-1.02577
				Wars	-1.02572
				Etv6	-1.02507
				Wnt9a	-1.02484
				Ubxn2b	-1.02467
				Cd38	-1.02443
				Best2	-1.02439
				Adamts8	-1.02426
				Klhl8	-1.0239
				Trim30d	-1.0237
				Slc41a1	-1.02355
				2010111I01Rik	-1.02353
				Lyrm9	-1.02346
				Gzf1	-1.0232
				Sgsm1	-1.02304
				Trim62	-1.02301
				Cep350	-1.02286
				Sqle	-1.02285
				Grap2	-1.0226
				Tnp2	-1.02248
				Klf13	-1.02236
				Pfkfb2	-1.02226
				Malat1	-1.02225
				Ampd2	-1.02184
				Fancf	-1.02139
				Fkbp5	-1.0212
				Mrpl38	-1.02102
				Cnpy1	-1.02069
				Ilvbl	-1.02031
				Btbd11	-1.02021
				Srfbp1	-1.01981
				1700024P04Rik	-1.01907
				Map4k2	-1.01885
				Chac1	-1.01875
				Ash2l	-1.01865
				Krit1	-1.01856
				Mtrr	-1.01837
				Krt13	-1.01834
				Selplg	-1.01822
				Nes	-1.01817
				Podxl2	-1.0181
				Tmtc4	-1.01772
				Vax2	-1.01765
				Osbpl3	-1.01763
				Tenm2	-1.01747
				Wtap	-1.01736
				Eif3d	-1.01725
				Cybb	-1.01721
				Hand2	-1.01705
				Smarca4	-1.0165
				Hhipl1	-1.01646
				1700011L22Rik	-1.01629
				1700026J12Rik	-1.01627
				Lig1	-1.01618
				Arl15	-1.01616
				Nptx2	-1.01613
				Dhx30	-1.01604
				Sntb2	-1.01567
				Mbp	-1.01557
				Sp7	-1.01469
				Pxdc1	-1.01467
				Gbp3	-1.01456
				Ifit3	-1.01442
				Prpf19	-1.01399
				5031415H12Rik	-1.01396
				Sulf2	-1.01387
				Api5	-1.01379
				Nrp1	-1.01308
				Otud4	-1.01269
				Comp	-1.01242
				Casp14	-1.01206
				Soga1	-1.01168
				Zeb1	-1.01125
				Kmt2a	-1.01116
				Reep3	-1.0108
				Ell	-1.01078
				Olfml2a	-1.01025
				Dcaf8	-1.01023
				Usp49	-1.01018
				Alg8	-1.01013
				Pla2g4f	-1.00998
				Dock10	-1.00984
				Tgfbr2	-1.00984
				Kdm5c	-1.00977
				Brip1os	-1.00956
				Plk3	-1.00915
				4930434B07Rik	-1.00899
				Kdm2b	-1.00891
				Grk6	-1.00877
				Ablim1	-1.00852
				Rgs12	-1.00816
				Nubp2	-1.00789
				Xbp1	-1.00772
				Vamp3	-1.00709
				Gm15867	-1.00645
				4932438H23Rik	-1.00582
				Otud5	-1.00521
				Cables1	-1.00497
				Wdr20	-1.00495
				Ptprc	-1.00471
				Sprr2j-ps	-1.00469
				Ddi2	-1.00463
				A930004D18Rik	-1.00452
				Cthrc1	-1.00435
				Tbc1d2	-1.00422
				Hnrnph1	-1.00354
				Socs1	-1.00334
				Agtr2	-1.00295
				Peg3	-1.00287
				4732496C06Rik	-1.00248
				Txndc9	-1.00245
				Sys1	-1.00235
				Abhd3	-1.00207
				Uggt1	-1.00203
				Ndnf	-1.00165
				9430091E24Rik	-1.00164
				Polr1a	-1.00161
				Gm94	-1.00101
				Rasl10a	-1.00063
				Apoa2	-1.00041
				Daam2	-0.999967
				H2-Ke6	-0.999206
				Pwwp2b	-0.998914
				Mrs2	-0.998703
				Prcp	-0.997914
				Lipn	-0.997774
				Gm9796	-0.997719
				Fam193b	-0.997587
				Pm20d1	-0.997572
				Ifnlr1	-0.997537
				4931417E11Rik	-0.997452
				Nol10	-0.997385
				E230013L22Rik	-0.997157
				Rufy3	-0.996835
				Bphl	-0.996675
				Pdia6	-0.996311
				Tmem167b	-0.995978
				Aftph	-0.995774
				Irf2bp2	-0.995682
				Minos1	-0.995628
				Rhno1	-0.995578
				Tcof1	-0.99528
				Alpk1	-0.995153
				Cypt12	-0.995126
				Gjb1	-0.994817
				Mchr1	-0.994738
				Ago2	-0.994536
				Bbs12	-0.994005
				Ginm1	-0.993821
				Adam26a	-0.993399
				Srpx2	-0.993182
				Shkbp1	-0.992887
				Gja4	-0.992478
				4933437G19Rik	-0.992313
				Usb1	-0.99231
				Itsn2	-0.992172
				Xdh	-0.992169
				Zfp286	-0.99204
				Ermn	-0.991942
				Usp1	-0.991794
				Azi2	-0.991179
				4933427J07Rik	-0.991173
				Gm16793	-0.990881
				Ints6	-0.990881
				Hus1	-0.990478
				Timp2	-0.990226
				Scaf11	-0.989969
				Spast	-0.989923
				Abhd6	-0.989754
				Mat2a	-0.989463
				Trim40	-0.989454
				Fzd6	-0.989345
				Gm6658	-0.989113
				Strc	-0.989107
				Oat	-0.98863
				Rab3c	-0.988418
				Nmbr	-0.988335
				Clec4g	-0.988335
				Cyp8b1	-0.988256
				Enam	-0.988255
				Hkdc1	-0.987971
				Mpp6	-0.987863
				Fcho2	-0.98767
				Tmem131	-0.987475
				Mmp10	-0.987469
				Gne	-0.987231
				Wnk3	-0.98723
				Trip4	-0.986846
				Ispd	-0.986838
				Sh3pxd2a	-0.986469
				Tfcp2l1	-0.985574
				Psg-ps1	-0.98556
				Igsf8	-0.985404
				Fam71a	-0.985389
				Gja3	-0.985307
				Ttll3	-0.985284
				Rpe	-0.984869
				Fryl	-0.98437
				Shh	-0.984181
				Cdkn2c	-0.984158
				Map2k7	-0.983893
				Plat	-0.983307
				Cyb561d2	-0.983157
				Hs3st2	-0.98302
				Sema4d	-0.982882
				Ehd1	-0.981914
				Tmx3	-0.981695
				Zc3h6	-0.981222
				Tbrg4	-0.981188
				Znhit2	-0.981052
				Creb3l2	-0.981011
				Tpcn2	-0.980848
				Hsd17b14	-0.980728
				Zbtb46	-0.98055
				Ahsa1	-0.980415
				Camkk1	-0.980251
				Lamc1	-0.980188
				Pros1	-0.980136
				B3gat2	-0.98
				Trmt10c	-0.979906
				Magix	-0.979892
				Lmnb2	-0.979627
				Nusap1	-0.979626
				Eprs	-0.97919
				Lsm14a	-0.978716
				Myo6	-0.978403
				Smad1	-0.978073
				Flii	-0.978008
				Mri1	-0.977833
				Armc3	-0.977783
				Mlec	-0.977464
				Kcnh1	-0.977188
				Cped1	-0.976848
				Nrxn2	-0.976733
				Ylpm1	-0.976675
				Trim47	-0.97626
				Mkln1	-0.975917
				Enpp4	-0.975662
				Ces1e	-0.975429
				Cd53	-0.975145
				C1qtnf7	-0.975095
				Gss	-0.974567
				Tmod3	-0.974381
				Thbs2	-0.97418
				Card10	-0.973945
				Tmsb10	-0.973882
				Ankrd33b	-0.973691
				Snrpc	-0.973466
				Cygb	-0.973408
				Pabpc4	-0.973001
				Guca1b	-0.973001
				Hexim1	-0.972986
				Tinag	-0.972386
				Hpdl	-0.972045
				Clec2e	-0.972029
				Nhlrc1	-0.971795
				Grk4	-0.97178
				Uimc1	-0.971378
				Ccdc163	-0.971283
				Mrgprf	-0.971055
				Tob2	-0.970694
				Lad1	-0.970303
				Lpin1	-0.970298
				AI661453	-0.970233
				Rsbn1	-0.969968
				Polr3gl	-0.969912
				Med12	-0.969694
				Slc39a12	-0.969503
				C1galt1	-0.969429
				Slc52a3	-0.969334
				4933432I03Rik	-0.969146
				Cpeb3	-0.968773
				Cdadc1	-0.968653
				Glipr1	-0.968168
				Gtf2h4	-0.968008
				Cpsf4l	-0.967883
				Asb2	-0.967779
				Dnajb5	-0.967743
				Tnik	-0.96723
				Slc25a36	-0.967193
				Cd209b	-0.967099
				Ankrd13a	-0.967052
				Dyrk2	-0.966967
				Mmp24	-0.966912
				Smug1	-0.96667
				Lnx1	-0.966625
				Bbs1	-0.966491
				Ralgps2	-0.966382
				Gna12	-0.966229
				Tmem164	-0.96616
				Taf1	-0.966122
				Zfp54	-0.966071
				Rnf32	-0.965847
				Kdm7a	-0.965844
				Sap30l	-0.965579
				Capn8	-0.965543
				Plk5	-0.965351
				Sh3pxd2b	-0.965223
				Mapk8ip1	-0.965105
				Camk1g	-0.965103
				Stam	-0.964911
				Krtap7-1	-0.964728
				Clpx	-0.964211
				Tfcp2	-0.963828
				Ccdc47	-0.96381
				Gp2	-0.96367
				Trip12	-0.963642
				Rps3	-0.963599
				Fzd2	-0.963434
				Thoc1	-0.963346
				B3galt1	-0.963213
				Zfpm2	-0.963095
				Trpc5	-0.963013
				Cryab	-0.962785
				Spred1	-0.962705
				Asic3	-0.962429
				Cog4	-0.962229
				Nupr1l	-0.962011
				Commd10	-0.962002
				Btk	-0.961788
				Trak1	-0.961698
				Hhex	-0.961004
				Fech	-0.960824
				Nacad	-0.960672
				Casp2	-0.960336
				Rpp14	-0.960283
				Rxra	-0.960265
				Slc43a3	-0.960149
				Ttc30a2	-0.959974
				Fndc8	-0.959019
				Bcor	-0.958755
				Abcd1	-0.958672
				Srf	-0.958316
				Tmub2	-0.958118
				Cul9	-0.957576
				Ugt2b34	-0.957242
				Znrd1	-0.957115
				Sbno2	-0.956696
				1700019A02Rik	-0.956478
				5530400K19Rik	-0.956464
				Rpl13a	-0.956307
				Gmeb2	-0.955758
				Tsc22d3	-0.955587
				Serhl	-0.955407
				Cul7	-0.955333
				Smarcb1	-0.955198
				Syt7	-0.954903
				Adnp2	-0.954849
				Notum	-0.954255
				B3galt2	-0.954083
				Fam69b	-0.954031
				Zan	-0.953987
				Arhgef26	-0.95346
				Lsm2	-0.95328
				Foxk2	-0.952799
				Slc39a14	-0.952651
				Xkr6	-0.952581
				Bbs7	-0.952487
				Slc26a3	-0.95224
				Patl1	-0.951845
				Cntn3	-0.951423
				Ldlr	-0.951414
				Thbs1	-0.951353
				Msh6	-0.951117
				Moxd1	-0.95104
				Ube2z	-0.950939
				Dclre1b	-0.950927
				Mpst	-0.950821
				Dtx1	-0.950805
				Tmem183a	-0.950094
				Trim9	-0.950078
				Foxp2	-0.949962
				Cdca2	-0.949766
				Pde6h	-0.949551
				Bloc1s4	-0.949262
				Ppp1r14c	-0.949083
				Trim46	-0.948861
				Ptpn6	-0.948701
				Acvr2a	-0.948551
				Cdh2	-0.948467
				9030404E10Rik	-0.948445
				Rgs16	-0.948329
				Kcnh3	-0.947979
				Alkbh1	-0.94794
				1600015I10Rik	-0.947696
				Guca1a	-0.94764
				Crispld1	-0.947638
				Cplx3	-0.947473
				Anxa2	-0.947392
				Vmn2r29	-0.946633
				1700013G24Rik	-0.946591
				Synj2	-0.946579
				Thap1	-0.946421
				Dnase1l1	-0.946146
				Dpagt1	-0.945729
				Kansl3	-0.94552
				Chrne	-0.945025
				4930448A20Rik	-0.945002
				Epdr1	-0.944945
				Crem	-0.94435
				Saal1	-0.944085
				Kif5b	-0.943715
				Iqcg	-0.943504
				Nacc1	-0.943333
				Pgr	-0.942894
				Pcdhb4	-0.942871
				Tbc1d15	-0.942846
				Klhl32	-0.942837
				Cpe	-0.942256
				Cyp2u1	-0.942143
				Sec14l1	-0.941846
				2700097O09Rik	-0.941745
				Paqr3	-0.941561
				D830026I12Rik	-0.941537
				Ehd3	-0.941469
				Mkrn1	-0.941237
				Gyg	-0.940797
				Mrm1	-0.940754
				Htra1	-0.940316
				Scyl2	-0.939699
				Map2k4	-0.939652
				Wipi2	-0.939643
				Tmem43	-0.939607
				Nr5a2	-0.939573
				Nub1	-0.939572
				Ocstamp	-0.939495
				Sestd1	-0.939083
				Fastkd5	-0.939057
				Gp9	-0.938944
				Cdyl2	-0.938398
				Pten	-0.938327
				Dap3	-0.938182
				Jam3	-0.937442
				Sfpq	-0.937029
				Cnga1	-0.936106
				Kcnf1	-0.936087
				Nfkbil1	-0.936038
				Idh2	-0.935677
				Myl4	-0.935578
				Cad	-0.935454
				Atoh7	-0.935249
				Rhbdl2	-0.934922
				Stk3	-0.934859
				Hspb1	-0.934798
				Os9	-0.934729
				Ppp3cb	-0.934274
				Slc35f6	-0.934208
				Oas1h	-0.933863
				Mrpl35	-0.933787
				Tbc1d8b	-0.933448
				Pon1	-0.933439
				Avpr2	-0.933439
				Plekha3	-0.932892
				Plekhm3	-0.932736
				Perm1	-0.932481
				Fam166a	-0.932251
				Timm10b	-0.932017
				Gzmb	-0.931898
				Topors	-0.931804
				A230006K03Rik	-0.931774
				Pfn3	-0.931629
				Barhl1	-0.931487
				Gtpbp4	-0.931441
				Crebrf	-0.93138
				Cib1	-0.931171
				Cd300a	-0.931065
				Kdelc2	-0.931052
				Fgg	-0.930941
				Ucn3	-0.930403
				Prss50	-0.930318
				Gja1	-0.930219
				Tnfrsf11b	-0.930188
				Muc20	-0.93013
				4831440E17Rik	-0.930098
				Cul4b	-0.930048
				Pnpla2	-0.929827
				S1pr1	-0.929617
				Ptpn5	-0.929612
				Tmem56	-0.929454
				Ubxn7	-0.929445
				Slc6a19os	-0.9293
				Fhod1	-0.929177
				Rhoh	-0.928467
				Map3k9	-0.928232
				Rnft1	-0.927983
				Wbp4	-0.927867
				Dedd2	-0.927582
				Smg1	-0.927417
				Lnpep	-0.927227
				Fosl2	-0.927066
				Asxl1	-0.926825
				Fam78a	-0.926821
				Pcx	-0.926768
				Ccr5	-0.926634
				Tox4	-0.926321
				Eri2	-0.925464
				Aar2	-0.925396
				Pex11a	-0.92538
				4933427D14Rik	-0.925052
				Ino80d	-0.924963
				Spp1	-0.9248
[truncated: 1,574 more rows]
